1 **SpoT and GppA hydrolases prevent the gratuitous activation of RelA by pppGpp in**  
2 ***Escherichia coli*.**

3 Rajeshree Sanyal<sup>1,2</sup> and Rajendran Harinarayanan<sup>1,\*</sup>

4 <sup>1</sup>Laboratory of Bacterial Genetics, Centre for DNA Fingerprinting and Diagnostics,  
5 Hyderabad, India.

6 <sup>2</sup>Graduate studies, Manipal Academy of Higher Education, Manipal, India.

7 Short title: RelA activation by pppGpp.

8 Keywords: GppA / (p)ppGpp / RelA / SpoT / stringent response

9 \* Corresponding author

10 E-mail: hari@cdfd.org.in (RH)

11

12

13

14

15

16

17

18

19

## 20 **Summary**

21 Stringent response, a conserved regulation seen in bacteria, is effected through the modified  
22 nucleotides (p)ppGpp. The metabolic cycle of these molecules is driven by the synthase  
23 activity of RelA and SpoT and the hydrolase activity of SpoT and GppA which together sets  
24 the basal (p)ppGpp pool. Growth arrest due to (p)ppGpp accumulation from basal RelA  
25 activity apparently explained the essentiality of SpoT hydrolase function. We found, pppGpp  
26 degradation was enhanced when the SpoT hydrolase activity was lowered or eliminated and  
27 when this was alleviated by inactivation of the GppA hydrolase, gratuitous synthesis of  
28 (p)ppGpp by RelA was activated, leading to growth arrest. The RelA-ribosome interaction  
29 was not mandatory for these phenotypes. Our results show, for the first time, elevated  
30 pppGpp promoted the amplification of RelA-mediated stringent response in the absence of  
31 established RelA activating signals in the cell and the SpoT and GppA hydrolases prevented  
32 this. The accumulation of pppGpp inhibited the SpoT hydrolase activity. We propose this  
33 autocatalytic activation of RelA by pppGpp is likely to be an allosteric regulation and can  
34 result in a bistable switch.

## 35 **Introduction**

36 Intracellular signaling molecules play a key role in the physiology of organisms by regulating  
37 key cellular processes and coordinating them with extracellular or intracellular signals  
38 (Pesavento and Hengge, 2009). In eubacteria, (p)ppGpp is a signaling molecule that  
39 accumulates during starvation, switching the balance of metabolism from growth and cell  
40 division to survival and stress response (Chatterji and Kumar Ojha, 2001; Braeken *et al.*,  
41 2006; Potrykus and Cashel, 2008; Haurlyliuk *et al.*, 2015). (p)ppGpp, also sometimes referred  
42 to as an ‘alarmone’, consist of a pair of molecules – guanosine tetraphosphate (ppGpp) and  
43 guanosine pentaphosphate (pppGpp), which are synthesized by the transfer of a

44 pyrophosphate moiety from ATP to GDP or GTP respectively (Potrykus and Cashel, 2008;  
45 Atkinson *et al.*, 2011). The gram-negative bacteria *Escherichia coli* is a well-studied model  
46 organism with regard to the role of (p)ppGpp in bacterial physiology.  $\beta$ - and  $\gamma$ -proteobacteria,  
47 including *E. coli*, have two proteins which are involved in stress response and (p)ppGpp  
48 metabolism – RelA and SpoT (Mittenhuber, 2001; Atkinson *et al.*, 2011). Both proteins are  
49 members of the Rel/Spo homolog (RSH) family and share similar domain architecture. The  
50 N-terminal half of the protein has the catalytic domain with the (p)ppGpp synthase and  
51 hydrolase functions in the case of SpoT and only synthase function in case of RelA. The C-  
52 terminal half of the protein has the regulatory domains important for sensing stress and  
53 starvation signals. RelA is a ribosome-bound protein that is activated by the “hungry” codons  
54 that appear following amino acid starvation and the consequent increase in the cellular  
55 concentration of uncharged t-RNA (Wendrich *et al.*, 2002). Recent cryo-electron microscopy  
56 studies have provided important insights into the structural basis for RelA activation by the  
57 entry of uncharged tRNA into the A-site of an elongating ribosome (Arenz *et al.*, 2016;  
58 Brown *et al.*, 2016; Loveland *et al.*, 2016). SpoT has a weak synthetic activity and a strong  
59 (p)ppGpp hydrolase activity and is an essential gene (An *et al.*, 1979; Xiao *et al.*, 1991). It  
60 not only regulates the basal (p)ppGpp levels in the cell (Sarubbi *et al.*, 1988), but also  
61 responds to various stress and starvation signals such as carbon (Xiao *et al.*, 1991), fatty acid  
62 (Seyfzadeh *et al.*, 1993) and iron (Vinella *et al.*, 2005) limitation. The SpoT hydrolase  
63 activity was inhibited in the presence of uncharged tRNA and more severely in the presence  
64 of ribosomes (Richter, 1980), conditions that mimic amino acid starvation. Various factors  
65 interact with SpoT and regulate the balance between its synthase and hydrolase functions.  
66 CgtA, a G-protein interacts with SpoT to up-regulate its hydrolase activity under nutrient-rich  
67 condition (Jiang *et al.*, 2007). The acyl carrier protein was reported to interact with SpoT and  
68 up-regulates its synthase activity during fatty acid starvation (Battesti and Bouveret, 2006). In

69 addition to SpoT, pppGpp is hydrolyzed by GppA, a pentaphosphate phosphohydrolase that  
70 converts it into ppGpp (Somerville and Ahmed, 1979; Harat and Sy, 1983; Keasling *et al.*,  
71 1993). The physiological relevance of this reaction is not clear. ppGpp being the predominant  
72 stringent nucleotide in the cell is considered to be the principal effector of stringent response  
73 (Mechold *et al.*, 2013).

74 The primary and well-studied target for (p)ppGpp is RNA polymerase, to which it binds  
75 independently or aided by the protein factor DksA (Ross *et al.*, 2013; Zuo *et al.*, 2013; Ross  
76 *et al.*, 2016) and alters the global transcriptome so as to promote survival under starvation or  
77 stress (Durfee *et al.*, 2008; Traxler *et al.*, 2012). Various models exist to explain the effects of  
78 (p)ppGpp at the level of transcription initiation or sigma factor competition (Barker *et al.*,  
79 2001; Paul *et al.*, 2004; Magnusson *et al.*, 2005). Together with DksA, (p)ppGpp inhibits  
80 transcription of rRNA operons and ribosomal protein genes and activates amino acid  
81 biosynthetic genes (Paul *et al.*, 2004; Paul *et al.*, 2005). Studies have shown alternative  
82 targets for (p)ppGpp in *E. coli* and in other organisms (Kanjee *et al.*, 2012). This includes  
83 enzymes from the nucleotide biosynthesis pathway, GTPases, particularly ObgE, EFG, EFTu,  
84 RF3 and IF2 (Miller *et al.*, 1973; Hamel and Cashel, 1974; Rojas *et al.*, 1984; Milon *et al.*,  
85 2006). DNA replication and cell division are regulated by (p)ppGpp (Schreiber *et al.*, 1995;  
86 Joseleau-Petit *et al.*, 1999; Wang *et al.*, 2007; Ferullo and Lovett, 2008).

87 Due to the essential nature of the SpoT function, studies have generally been performed using  
88 point mutants that altered the steady-state levels of ppGpp. Using a SpoT depletion system,  
89 changes in the (p)ppGpp metabolic pattern and the associated growth response can be  
90 monitored. In this study, we report, during SpoT depletion or in the hydrolase mutants of  
91 *spoT*, there was reduction in the pppGpp pool and this was required to support growth. Our  
92 results show, GppA and an uncharacterized activity together lowered the pppGpp pool and  
93 prevented the gratuitous activation of RelA-dependent (p)ppGpp synthesis that conferred

94 growth arrest. Two hypomorphic *relA* alleles that allowed GppA-dependent survival in the  
95 absence of SpoT function were isolated and characterized. Using one of the alleles, we show  
96 that the accumulation of only ppGpp was insufficient to confer sustained growth arrest. Our  
97 results show pppGpp can serve as a positive signal for the amplification of RelA-mediated  
98 stringent response in the absence of known documented signals and therefore its level is  
99 tightly regulated by the SpoT and GppA hydrolases.

## 100 **Results**

### 101 *Depletion of SpoT results in the enhanced degradation of pppGpp*

102 The *spoT* gene function that is essential in the wild-type *E. coli* was dispensable in the *relA*  
103 mutant (Xiao *et al.*, 1991), and therefore, the essential *spoT* function was inferred as the  
104 degradation of (p)ppGpp synthesized through the basal RelA activity. To test this, (p)ppGpp  
105 accumulation was followed as the cellular SpoT activity was reduced using a system  
106 designed to gradually deplete it. To do this, the chromosomal *spoT* gene was knocked out and  
107 SpoT was expressed in a regulated fashion from a plasmid (see methods). For ease of genetic  
108 manipulations, either of the two null mutant alleles reported in the literature, namely,  
109 *spoT212*, a markerless *spoT* deletion or *spoT207::Cm* have been used in strain constructions.  
110 In the  $\Delta spoT/pRCspoT$  strain wherein the chromosomal *spoT* gene was deleted, growth was  
111 expected to be dependent on the IPTG-driven expression of the *spoT* gene present in the  
112 single copy unstable plasmid pRC*spoT* (Nazir and Harinarayanan, 2016). When the  
113  $\Delta spoT/pRCspoT$  strain, cultured in the presence of IPTG was washed and sub-cultured,  
114 IPTG-dependent growth was observed (Fig. 1A) indicating that the system can be used to  
115 study the consequences of SpoT depletion.

116 To monitor (p)ppGpp levels, cells cultured in the presence or absence of IPTG were allowed  
117 to undergo at least two divisions in the low phosphate medium containing  $^{32}\text{P-H}_3\text{PO}_4$  and

118 subjected to thin layer chromatography. This method allowed (p)ppGpp levels to be  
119 measured when the growth of the strain was retarded due to the depletion of SpoT (Fig. 1B  
120 and 1C). Following SpoT depletion, ppGpp accumulated, but pppGpp was not detectable. We  
121 tested different dilutions in order to deplete SpoT to varying extents, and in each case, the  
122 result was similar (data not shown). Unlike the  $\Delta spoT/pRCspoT$  strain, the growth of the  
123  $\Delta relA \Delta spoT/pRCspoT$  strain was less significantly inhibited following SpoT depletion (Fig.  
124 S1) and (p)ppGpp accumulation was not detected here (data not shown). Nevertheless, the  
125 growth rate of the strain was reduced in the absence of IPTG, which could be due to the  
126 composition of the growth medium used (all amino acids at 40 $\mu$ g/ml). It has been reported,  
127 the growth of the ppGpp<sup>0</sup> strain in a defined medium was sensitive to amino acid composition  
128 (Potrykus *et al.*, 2011).

129 Due to the presence of amino acids in the growth medium, the signal for RelA activation  
130 would be low, this, and the conversion of pppGpp to ppGpp by GppA can together account  
131 for the lack of detectable pppGpp accumulation. To test this, isoleucine starvation was  
132 provoked by the addition of valine (Leavitt and Umbarger, 1961) before or after SpoT  
133 depletion and the (p)ppGpp synthesis was studied. In the culture induced for *spoT*  
134 expression, a typical stringent response, that is, accumulation of ppGpp and pppGpp and  
135 depletion of GTP was observed (Fig. 1D, lanes 1 – 4). This indicated, the SpoT expression  
136 from plasmid did not significantly perturb the stringent response. Following SpoT depletion,  
137 a significant accumulation of ppGpp was seen prior to starvation and this further increased  
138 with the onset of amino acid starvation; interestingly, pppGpp was still not detectable (Fig.  
139 1D, lanes 5 – 8). This indicated, pppGpp accumulation was especially reduced, as compared  
140 to ppGpp during SpoT depletion. The absence of pppGpp could be due to its reduced  
141 synthesis or increased degradation or both. The results described below show the GppA  
142 hydrolase function was partly required to observe this phenotype. In early studies (Laffler and

143 Gallant, 1974; Fiil *et al.*, 1977), it was reported that the hydrolase deficient *spoT1* allele  
144 accumulated mainly ppGpp during amino acid starvation. We confirmed that following  
145 amino acid starvation, the *spoT1* mutant, like the SpoT depleted strain, showed RelA-  
146 dependent accumulation of ppGpp, but not pppGpp (Fig. S2). These results suggest, counter-  
147 intuitively, lowering the SpoT hydrolase activity lowered the pppGpp accumulation.

148 ***Hypomorphic relA alleles provide evidence for concomitant synthesis and degradation of***  
149 ***ppGpp during stringent response following amino acid starvation***

150 To identify mutations that suppressed the growth defect of the  $\Delta spoT$  strain, transposon-  
151 mediated mutagenesis was carried out in the  $\Delta spoT::Cm/pRCspoT$  strain and mutants that  
152 survived the loss of pRC*spoT* were identified as white colonies from the LB IPTG X-Gal  
153 plates. In order to further identify the loss of function *relA* mutants amongst these, the white  
154 colonies were screened using the SMG plate test for RelA functionality (Uzan and Danchin,  
155 1976). The *relA* null mutant or mutants that exhibit very low activity (such as *relA1*) do not  
156 grow on minimal medium with glucose and the amino acids serine, methionine, and glycine  
157 (SMG) (Fig. S3, rows 1 and 2). About 50% of the white colonies screened showed SMG  
158 sensitivity and were excluded from further analysis. The insertions in two separate SMG-  
159 resistant mutants were mapped and used for further studies. Somewhat surprisingly, one of  
160 the transposon insertions was within the *relA* gene (after the 496<sup>th</sup> codon) and the other at the  
161 end of the *rlmD* gene that is immediately upstream of *relA* (Fig. 2A). These insertions,  
162 referred to as *relA::Tn10dTet* and *rlmD::Tn10dKan*, when individually introduced into the  
163  $\Delta spoT::Cm/pRCspoT$  strain by phage P1 transduction, allowed the segregation of white  
164 colonies on LB agar plates with IPTG and X-Gal (Fig. 2B, panels ii and iii), suggesting the  
165 presence of each mutation was sufficient to support growth in the absence of SpoT function.  
166 The *relA::Tn10dTet*  $\Delta spoT::Cm$  and *rlmD::Tn10dKan*  $\Delta spoT::Cm$  strains grew on minimal  
167 glucose medium with or without SMG, while the *spoT*<sup>+</sup> derivatives did not grow in the

168 presence of SMG (Fig. S3, rows 3, 4, 9 and 10). These results showed that a certain threshold  
169 of RelA activity and possibly (p)ppGpp accumulation can be tolerated in the absence of SpoT  
170 function. The *relA1* allele also survives the *spoT* deletion and the *relA1 ΔspoT* strain grows in  
171 minimal medium (Xiao *et al.*, 1991) suggesting the presence of (p)ppGpp in this strain. *relA1*  
172 is a naturally selected hypomorphic allele present in the laboratory strains, wherein two  
173 polypeptides come together to reconstitute a weak (p)ppGpp synthase activity, which is  
174 evident upon over-expression (Metzger *et al.*, 1989). Unlike *relA1*, the *relA1 ΔspoT* strain  
175 could grow slowly on SMG plate, with single colonies observed after 72 hrs (Fig. S4A).  
176 These results indicated that the basal (p)ppGpp pool increased in the absence of SpoT  
177 function in all the hypomorphic *relA* alleles tested.

178 The transposon insertion after the 496<sup>th</sup> codon of *relA* generated a UAA stop codon at the site  
179 of insertion and therefore was expected to produce a truncated polypeptide containing the 496  
180 amino-terminal amino acids (RelA496Δ). A plasmid-encoded RelA polypeptide with the 455  
181 amino-terminal amino acids, expressed from the IPTG-inducible P<sub>tac</sub> promoter showed  
182 constitutive (p)ppGpp synthesis and was incapable of sensing amino acid starvation; the  
183 polypeptide had a half-life of 7.5 minutes as compared to the 2-3 hours for the full-length  
184 RelA protein (Schreiber *et al.*, 1991; Svitils *et al.*, 1993). To compare the phenotypes of the  
185 RelA truncations, precise deletions were engineered in the chromosomal *relA* gene. These  
186 alleles referred as *relA496Δ::Kan* and *relA455Δ::Kan*, when introduced in the  
187 *ΔspoT/pRCspoT* strain could support growth in the absence of SpoT function, which was  
188 evident from the appearance of white colonies (Fig. 2B, panel iv, and v) in the plasmid  
189 segregation assay. The white colonies with the *relA496Δ::Kan ΔspoT* and *relA455Δ::Kan*  
190 *ΔspoT* genotypes exhibited SMG-resistance unlike their *spoT*<sup>+</sup> counterparts (Fig. S3, rows 5 –  
191 8), and suggested that the absence of SpoT function elevated the cellular (p)ppGpp pool in  
192 these strains. Indeed, a slightly elevated basal ppGpp pool was observed in the SMG-resistant



193 *relA::Tn10dTet ΔspoT::Cm* strain when compared to the SMG-sensitive *relA::Tn10dTet*  
194 *spoT<sup>+</sup>* strain (Fig. 2C (i), lanes 1 and 5). Amino acid starvation did not elicit stringent  
195 response in either strain (Fig. 2C (i), lanes 2 – 4 and 6 – 8), and this is consistent with the  
196 reports that the RelA-CTD is required for sensing the ribosome-dependent amino acid  
197 starvation signals (Arenz *et al.*, 2016; Brown *et al.*, 2016; Loveland *et al.*, 2016). These  
198 results suggest, RelA' (truncated RelA), when expressed at physiological levels could not  
199 elevate the (p)ppGpp pool in the presence of SpoT hydrolase activity.

200 The transposon insertion *rlmD::Tn10dKan*, 13-bp upstream from the *rlmD* stop codon (Fig.  
201 2A) can potentially alter the RelA expression and also the RlmD activity. To test if the  
202 suppression of *ΔspoT* growth defect resulted from the loss of RlmD function, the *ΔrlmD::Kan*  
203 allele from the Keio collection (Baba *et al.*, 2006) was introduced in the wild-type and  
204 *ΔspoT/pRCspoT* strains by Phage P1 transduction. Suppression was not evident in the  
205 *ΔrlmD::Kan ΔspoT/pRCspoT* strain as it did not segregate white colonies on LB IPTG X-Gal  
206 plate (Fig. 2B, panel vi), however, flip-out of the Kanamycin marker supported the  
207 segregation of white colonies (Fig. 2B, panel vii) and the growth of these colonies on  
208 minimal medium containing SMG (Fig. S3, rows 11 – 13). These results showed that the loss  
209 of RlmD function was not necessary for suppression, while the altered *relA* expression after  
210 the flip-out of the Kan cassette was sufficient for the suppression of the *ΔspoT* growth defect.  
211 We propose the *rlmD::Tn10dKan* and *ΔrlmD::FRT* mutations reduced the *relA* expression,  
212 the former possibly terminated transcripts originating from the promoters within and  
213 upstream of *rlmD* (Metzger *et al.*, 1988; Nakagawa *et al.*, 2006; Brown *et al.*, 2014), and the  
214 latter eliminated the promoters reported within the *rlmD* ORF. Making use of *lacZ* reporter  
215 fusions at the chromosomal locus of these genes, the relative contribution of the promoters  
216 located within the *rlmD* ORF to those upstream was studied (Fig. S5). The promoters within  
217 the *rlmD* ORF increased the expression 75-fold, indicating that they predominantly

218 contributed to the RelA expression. The reason, the  $\Delta rlmD::Kan$  allele failed to suppress the  
219  $\Delta spoT$  growth defect could be because promoter(s) within the Kan<sup>R</sup> cassette partially or fully  
220 compensated for the loss of expression from the native *relA* promoters.

221 SMG resistance was observed in the *rlmD::Tn10dKan*  $\Delta spoT::Cm$  strain but not in the  
222 *rlmD::Tn10dKan* strain (Fig. S3, rows 9 and 10), however, no significant difference in basal  
223 ppGpp is evident between the two strains (Fig. 2C (ii), lanes 1 and 5). Similarly, the  
224  $\Delta rlmD::FRT$  strain showed SMG-resistance (Fig. S3, row 12), but increase in the basal  
225 ppGpp pool was not evident (Fig. 2C (iii) lane 1). Our results suggest, marginal increase in  
226 the ppGpp pool less than that which can be reliably detected by 1D-TLC was sufficient to  
227 confer SMG-resistance. The  $\Delta rlmD::FRT$   $\Delta spoT$  strain showed SMG-resistance (Fig. S3, row  
228 13) and a slightly elevated basal ppGpp pool (Fig. 2C (iii), lane 5). Amino acid starvation did  
229 not cause (p)ppGpp accumulation in the *rlmD::Tn10dKan*, *rlmD::Tn10dKan*  $\Delta spoT::Cm$  and  
230  $\Delta rlmD::FRT$  strains (Fig. 2C (ii) lanes 2 – 4 & 6 – 8; Fig. 2C (iii) lanes 2 – 4). However,  
231 stringent response was elicited in the  $\Delta rlmD::FRT$   $\Delta spoT$  strain and accumulation of ppGpp,  
232 but not pppGpp was observed (Fig. 2C (iii), 6 – 8); the rate of ppGpp accumulation was  
233 slower as compared to the wild-type or *spoT1* strain (compare Fig. 1D, lane 2; Fig. S2 lane 2  
234 and Fig. 2C (iii) lane 6). This result provides evidence for the SpoT-mediated degradation of  
235 ppGpp being concomitant with the RelA-mediated synthesis of (p)ppGpp during stringent  
236 response. This was not entirely expected, because, the SpoT hydrolase activity was reported  
237 to be inhibited during the amino acid-induced stringent response (Richter, 1980). The  
238 concomitant synthesis and degradation of (p)ppGpp imply the concentration of these  
239 molecules at any given time is set by the sum total of their synthesis and degradation rates.  
240 This would have implications for the amplification of the stringent response, because, it was  
241 reported that (p)ppGpp increased the rate of their own ribosome-dependent synthesis by RelA  
242 *in vitro* (Shyp *et al.*, 2012; Kudrin *et al.*, 2018). The results imply, the SpoT hydrolase

243 activity can directly contribute to the regeneration of GDP from stringent nucleotides during  
244 the stringent response and indirectly to GTP as it was proposed that GDP would be converted  
245 to GTP by Ndk (Kari *et al.*, 1977; Heinemeyer and Richter, 1978).

246 ***GppA activity prevented gratuitous (p)ppGpp synthesis and growth arrest in strains with***  
247 ***reduced spoT hydrolase activity***

248 The accumulation of ppGpp but not pppGpp, after SpoT depletion or reduction in the  
249 hydrolase activity (*spoT1* mutant), suggested altered (p)ppGpp metabolism. One possibility  
250 was, RelA preferentially synthesized ppGpp under these conditions. Results in the previous  
251 section highlighted the role of SpoT hydrolase activity in the regeneration of GTP during the  
252 stringent response, therefore it was possible, pppGpp synthesis was limited by GTP  
253 availability. Furthermore, there was evidence *in vitro* that the *E. coli* RelA prefers GDP as a  
254 substrate over GTP (Sajish *et al.*, 2009). We, therefore, asked if increasing the cellular GTP  
255 pool in the *spoT1* mutant would support pppGpp accumulation during stringent response. We  
256 used the *gsk3* allele that codes for the feedback-resistant guanosine kinase and reported to  
257 increase the intracellular GTP pool in the presence of guanosine (Petersen, 1999). Normally  
258 there is a growth inhibition associated with GTP accumulation, but this can be overcome by  
259 histidine and tryptophan supplementation (Petersen, 1999). Stringent response in the *spoT1*  
260 *gsk3* strain, in the absence of guanosine, was similar to that seen in the *spoT1* mutant. In the  
261 presence of guanosine, the only significant difference observed was the absence of GTP  
262 depletion (Fig. S6). Assuming this reflected an increase in the GTP pool, the result suggested  
263 an increase in the GTP level was insufficient to support pppGpp synthesis in the *spoT1*  
264 mutant.

265 Another possible reason for the absence of pppGpp accumulation could be, the pppGpp  
266 synthesized was rapidly turned over into ppGpp by GppA, a cytoplasmic pppGppase that is

267 not ribosome-associated (Somerville and Ahmed, 1979). To test this, the  $\Delta gppA::Kan$  allele,  
268 sourced from the Keio collection (Baba *et al.*, 2006), was introduced by phage P1  
269 transduction to construct the  $\Delta spoT::Cm \Delta gppA::Kan/pRCspoT$  and  $spoTl$   
270  $\Delta gppA::Kan/pRCspoT$  strains. During SpoT depletion, growth of the  $\Delta spoT::Cm$   
271  $\Delta gppA::Kan/pRCspoT$  strain was more severely inhibited as compared to the  
272  $\Delta spoT::Cm/pRCspoT$  strain (Fig. 3A (i)). The plating efficiency dropped at least three orders  
273 of magnitude in the former strain as compared to the latter strain (Fig. 3A (ii)). When the  
274 stringent nucleotides pool was determined in the  $\Delta spoT::Cm \Delta gppA::Kan/pRCspoT$  strain  
275 after the growth retardation that followed SpoT depletion (Fig. S7), accumulation of ppGpp,  
276 pppGpp, and depletion of GTP was observed (Fig. 3B). This showed the absence of pppGpp  
277 accumulation during SpoT depletion in the  $\Delta spoT::Cm/pRCspoT$  strain was partly due to the  
278 GppA activity. In addition to pppGpp accumulation there was also a significant decrease in  
279 the GTP pool when compared to the SpoT depletion in  $gppA^+$  strain (compare Fig. 3B, lane2  
280 with Fig. 1C, lane 3).

281 We asked if the lack of pppGpp accumulation during the stringent response in the hydrolase  
282 deficient  $spoTl$  strain (Fig. S2) was also due to the GppA activity. Interestingly, synthetic  
283 growth defect was evident when the  $\Delta gppA::Kan$  allele was introduced into the  $spoTl$  genetic  
284 background. The  $spoTl \Delta gppA::Kan/pRCspoT$  strain failed to segregate white colonies  
285 ( $spoTl \Delta gppA::Kan$  genotype) in the minimal glucose medium with or without casamino  
286 acids and the white colonies were slow growing in LB medium (Fig. 4A, panels ii, vi and x).  
287 Deletion of the *relA* gene suppressed the synthetic growth defect (white colonies in panels iv,  
288 viii and xii). The slow-growing  $spoTl \Delta gppA::Kan$  strain could be maintained on LB plate  
289 but failed to grow on minimal glucose medium with or without casamino acids (data not  
290 shown). Apparently, an elevated basal pppGpp pool and lowered *spoT* hydrolase activity  
291 together conferred synthetic growth inhibition in the presence of RelA activity, while

292 individually they affected the growth marginally at best (Fig. 4A, the white colonies in panels  
293 i, v and ix have the *spoT1* genotype, blue colonies in panels ii, vi and x have the  $\Delta gppA::Kan$   
294 genotype). Another hydrolase deficient *spoT* allele, *spoT202* (Sarubbi *et al.*, 1989), also  
295 showed synthetic growth defect with the  $\Delta gppA::Kan$  allele and the growth defect was more  
296 severe than seen for the *spoT1* allele as no white colonies could be recovered on LB medium  
297 in addition to minimal medium (data not shown). This suggested, the synthetic growth defect  
298 with  $\Delta gppA$  arose specifically from the SpoT hydrolase deficiency. As described below, the  
299 synthetic growth inhibition was associated with accumulation of (p)ppGpp and the reduced  
300 degradation of (p)ppGpp.

301 To find out if the *spoT1*  $\Delta gppA::Kan$  growth defect was accompanied by a change in the  
302 stringent nucleotides pool, SpoT depletion was carried out by IPTG withdrawal in the *spoT1*  
303  $\Delta gppA::Kan$  /pRC*spoT* strain. As a control, depletion was carried out in the *spoT1*/pRC*spoT*  
304 strain (Fig. 4B). Before and after SpoT depletion, the *spoT1*/pRC*spoT* strain exhibited  
305 stringent response like the wild-type and *spoT1* strains respectively. That is, isoleucine  
306 starvation induced ppGpp and pppGpp synthesis following growth in the presence of IPTG  
307 (Fig. 4B, lanes 1–4) and mainly ppGpp, following growth in the absence of IPTG (Fig. 4B,  
308 Lanes 5–8) similar to the *spoT1* mutant (Fig. S2, lanes 1 – 4). This indicated, IPTG  
309 withdrawal sufficiently depleted the plasmid-encoded protein that the phenotype of the  
310 chromosomal allele was evident. As expected, IPTG withdrawal also induced growth  
311 inhibition in the *spoT1*  $\Delta gppA::Kan$ /pRC*spoT* strain, and associated with the growth  
312 inhibition the (p)ppGpp pools were elevated (Fig. 4B, lane 13) and which increased further  
313 following amino acid starvation (Fig. 4B, lanes 14–16). The results indicated that elevated  
314 pppGpp pool activates RelA-dependent (p)ppGpp synthesis in the *spoT1* strain without amino  
315 acid starvation. During stringent response in the presence of IPTG, the *spoT1*  
316  $\Delta gppA$ /pRC*spoT* strain accumulated similar levels of ppGpp and pppGpp (Fig. 4B, lanes 10 –

317 12) as reported for a *gppA* mutant (Somerville and Ahmed, 1979). However, after IPTG  
318 withdrawal, that is, in the phenotypically *spoT1 ΔgppA* cells, pppGpp accumulated less than  
319 ppGpp (Fig. 4B, lanes 14-16), the plausible reasons for this are discussed later.

320 Since *relA* deletion suppressed the *spoT1 gppA* synthetic growth defect (Fig. 4A, panels iv,  
321 viii and xii), we tested the effect of the hypomorphic *relA* alleles. Plasmid-free derivatives of  
322 *relA496Δ::Kan spoT1 ΔgppA::Kan/pRCspoT* and *ΔrlmD::FRT spoT1 ΔgppA::Kan/ pRCspoT*  
323 strains (white colonies) were recovered on LB and as well as minimal glucose medium with  
324 or without casamino acids (data not shown). This suggested wild-type level expression of  
325 full-length RelA was needed for gratuitous (p)ppGpp synthesis and growth arrest in the  
326 *spoT1 ΔgppA::Kan* background. Since the *relA496Δ::Kan* and *ΔrlmD::FRT* alleles supported  
327 growth in the complete absence of *spoT* function (Fig. 2B, panels iv and vii) we asked if the  
328 growth of these strains were dependent on the GppA function. Plasmid free derivatives (white  
329 colonies) could not be recovered from the *relA496Δ::Kan ΔspoT ΔgppA::Kan/pRCspoT* and  
330 *ΔrlmD::FRT ΔspoT ΔgppA::Kan /pRCspoT* strains on LB (Fig. 4C) and in the minimal  
331 glucose medium as well (data not shown). SpoT depletion was carried out in these strains to  
332 ask if the growth arrest was accompanied by (p)ppGpp accumulation. Gratuitous synthesis of  
333 ppGpp and to a lesser extent, pppGpp, was observed in both strains (Fig. 4D). Notably,  
334 (p)ppGpp synthesis by the *relA496Δ::Kan* allele indicated that ribosome binding was not  
335 necessary for the pppGpp dependent activation. These results indicate, the residual hydrolase  
336 activity in the *spoT1* allele (as compared to the *ΔspoT* allele) prevented the activation of  
337 hypomorphic *relA* alleles by pppGpp to gratuitously synthesize (p)ppGpp. We tested, if the  
338 *relA1* allele, possibly the weakest of the hypomorphic allele studied here also exhibited  
339 synthetic growth defect in the *ΔspoT ΔgppA::Kan* background. Plasmid-free derivatives could  
340 be recovered from the *relA1 ΔspoT ΔgppA::Kan / pRCspoT* strain and no growth phenotype  
341 was evident in this strain as compared to the parental strain, *relA1 ΔspoT*, in LB or minimal

342 medium (Fig. S4B). This suggested, the *relA1* allele, unlike the *relA496Δ* or *ΔrlmD::FRT*  
343 alleles was not activated by pppGpp to carry out gratuitous (p)ppGpp synthesis. It is possible,  
344 in RelA1, the structural determinants required for allosteric activation by pppGpp may not be  
345 present since the (p)ppGpp synthase activity was reconstituted by two polypeptides in trans.

#### 346 ***SpoT mediated degradation of (p)ppGpp is inhibited by pppGpp***

347 To understand the *ΔgppA spoT1* synthetic growth defect, the contribution of GppA and SpoT,  
348 individually and together, to the turnover of the stringent nucleotides was studied. Isoleucine  
349 starvation was induced with valine to allow the accumulation of (p)ppGpp and the kinetics of  
350 degradation was monitored after the reversal of starvation by isoleucine addition. As  
351 reported, the GTP pool decreased and that of the stringent nucleotides increased following  
352 amino acid starvation in the wild-type strain (Fig. 5A). In the *ΔgppA* strain, following  
353 starvation, the GTP and pppGpp pools were, respectively, 2.5-fold lower and 3.8-fold higher  
354 than in the wild-type; the ppGpp pool was not significantly altered (Fig. 5A & B, table S2).  
355 Consistent with the biochemical activity of GppA, an increase in the pppGpp pool was  
356 expected, but the decrease in GTP pool was unexpected. We suspected this could be due to  
357 the reduced regeneration of GTP from the stringent nucleotides following the inhibition of  
358 SpoT hydrolase activity by the increase in pppGpp. As seen from Fig. 2C (iii), SpoT activity  
359 contributes to the degradation of ppGpp to GDP, during amino acid starvation; GTP can then  
360 be made from GDP. Indeed, in the *ΔgppA* strain, following the inhibition of RelA activity by  
361 the reversal of amino acid starvation, we observed the rate of degradation of the stringent  
362 nucleotides and the accumulation of GTP was slightly reduced as compared to the wild-type  
363 strain (Fig. 5A & B, table S2). It is conceivable, pppGpp may be poorly hydrolyzed relative  
364 to ppGpp, by SpoT, and therefore, an increase in the pppGpp pool inhibited GTP generation  
365 by competitively inhibiting the ppGpp degradation to GDP by SpoT (Fig. 7).

366 The effect of the increased pppGpp pool on (p)ppGpp degradation by the *spoT1* allele was  
367 studied. We confirmed the ppGpp degradation rate following amino acid starvation was  
368 reduced in the *spoT1* strain as reported (Fig. 5C). Quantification showed 54% degradation of  
369 ppGpp fifteen minutes after reversal of amino acid starvation (Fig. 5E, Table S3) while it was  
370 virtually undetectable after 1 minute in the *spoT*<sup>+</sup> strain (Fig. 5B, Table S2). When the  
371 pppGpp pool was elevated in the *spoT1*  $\Delta$ *gppA*::FRT/pRC*spoT* strain by SpoT depletion, the  
372 (p)ppGpp degradation was more severely impaired (Fig. 5D). There was only 22%  
373 degradation of ppGpp and 19% degradation of pppGpp after 15 minutes (Fig. 5E and Table  
374 S4). It is possible, the increase in (p)ppGpp pool from the turnover defect contributes to the  
375 allosteric activation of RelA and the growth arrest of *spoT1*  $\Delta$ *gppA* strain.

### 376 ***Synergistic inhibition of growth by ppGpp and pppGpp***

377 As described above, the RelA-dependent growth arrest in the *spoT1*, *relA496* $\Delta$ ::FRT  $\Delta$ *spoT*  
378 and  $\Delta$ *rlmD*::FRT  $\Delta$ *spoT* strains were contingent on the loss of GppA function. Based on the  
379 principal biochemical activity of GppA, which is the conversion of pppGpp to ppGpp, and  
380 the elevated pppGpp pool observed during the growth inhibition, it was deduced as the  
381 primary determinant driving RelA activation, although it was less abundant than ppGpp  
382 during the growth arrest (Fig. 3B, lane 2; Fig. 4B, lane 13; Fig. 4D, lanes 2 & 4; Fig. 5D, lane  
383 1). We asked, if elevated ppGpp, in the absence of pppGpp, inhibited growth, and if so,  
384 whether it was different from that seen in the additional presence of pppGpp. We took  
385 advantage of the phenotype of the  $\Delta$ *rlmD*::FRT  $\Delta$ *spoT* strain, which accumulated ppGpp but  
386 no detectable pppGpp during amino acid starvation (Fig. 2C (iii), lanes 6 to 8) and the ppGpp  
387 degradation rate was greatly diminished after the reversal of amino acid starvation (Fig. 6A),  
388 due to the absence of SpoT function. The ppGpp pool size was virtually unaltered for up to  
389 60 minutes and reduced 28% and 37% respectively 120 and 180 minutes after the reversal of  
390 starvation (Fig. 6B and table S5). These results show SpoT as the primary ppGpp hydrolase.



391 Growth arrest and recovery associated with amino acid starvation and its reversal were  
392 monitored in the  $\Delta rlmD::FRT \Delta spoT$  mutant and compared with that seen in the wild-type,  
393 *spoT1*, and  $\Delta rlmD::FRT$  strains. As expected, growth ceased and resumed immediately  
394 following amino acid starvation and its reversal in the wild-type strain (Fig. S8A). In the  
395 *spoT1* strain, the starvation-induced growth arrest was similar to the wild-type, but growth  
396 resumed after a lag of ~30 minutes following the reversal of starvation (Fig. S8B), which  
397 correlated with the reduced rate of ppGpp degradation observed in the *spoT1* mutant (Fig.  
398 5C). Isoleucine starvation in the  $\Delta rlmD::FRT \Delta spoT$  strain caused immediate growth arrest,  
399 but after the reversal of starvation, growth inhibition persisted for 120 minutes and then the  
400 growth resumed. After 120 minutes, the ppGpp pool was ~54% of GTP (Fig. 6B, 6C & Table  
401 S5) and this can be taken as the lowest pool size at which ppGpp conferred growth inhibition.  
402 One hour after growth resumed, that is, 180 after isoleucine addition, the ppGpp pool was  
403 ~45% of GTP (Fig. 6C and Table S5). Isoleucine starvation and its reversal in the  
404  $\Delta rlmD::FRT$  strain, which did not accumulate ppGpp (Fig. 2C(iii), lanes 2 to 4), produced  
405 growth arrest and reversal similar to the wild-type strain (Fig. S8C), and indicated that the  
406 accumulation of ppGpp was responsible for the transient growth arrest in the  $\Delta rlmD::FRT$   
407  $\Delta spoT$  strain. When growth inhibition from ppGpp and (p)ppGpp accumulation was  
408 compared, it was more severe when both pppGpp and ppGpp are present. For instance, in the  
409 *spoT1*  $\Delta gppA$  /pRCspoT strain, where the growth arrest was severe and prolonged following  
410 SpoT depletion, ppGpp and pppGpp accumulated to 37% and 13% of GTP respectively after  
411 SpoT depletion (Fig. 5D, lane 1, table S4). These results showed that the growth inhibition  
412 conferred by ppGpp in isolation was transient, and this was strongly accentuated in the  
413 presence of pppGpp. While we did not measure ppGpp levels beyond 180 minutes, the  
414 continued growth of the  $\Delta rlmD::FRT \Delta spoT$  strain suggested that there could progressive

415 decrease in the ppGpp pool and that eventually it may be degraded, although very  
416 inefficiently, by hydrolases other than SpoT.

## 417 **Discussion**

### 418 *Autocatalytic activation of RelA by pppGpp*

419 This study was initiated to test the prediction that the stringent nucleotides would accumulate  
420 in the cell following the depletion of SpoT activity. While an increase in the ppGpp pool was  
421 observed, accumulation of pppGpp was not seen and furthermore the pppGpp levels was not  
422 completely restored by inactivation of the pppGpp hydrolase, GppA. The results indicated  
423 that the degradation of pppGpp was enhanced during SpoT depletion and this was necessary  
424 to prevent RelA activation. RelA activation by pppGpp was clearly manifest in the *relA496Δ*  
425 *ΔspoT* and *ΔrlmD::FRT ΔspoT* strains, where, the slightly elevated ppGpp pool (Fig. 2C(i)  
426 lane 5 and 2C(iii) lane 5), increased several-fold after inactivation of GppA and pppGpp  
427 synthesis was evident (Fig. 4D lane 2 and 4). Since the (p)ppGpp pool increased in the  
428 absence of SpoT protein, and therefore totally independent of the hydrolase or synthase  
429 functions of SpoT, the increase in (p)ppGpp pool can be attributed entirely to the activation  
430 of RelA by the elevated basal pppGpp pool (from the loss of GppA activity). While the  
431 increase in the pppGpp pool may be important to initiate the allosteric activation of RelA,  
432 once initiated, the autocatalytic reaction may be sustained by both stringent nucleotides.  
433 ppGpp was reported to allosterically activate its own ribosome-dependent synthesis *in vitro*  
434 (Shyp *et al.*, 2012). However, given that a C-terminal His<sub>6</sub>-tagged protein was used in that  
435 study and RelA's C-terminus resides well inside the ribosomal complex, it was likely that the  
436 functionality of the protein was compromised. In a recent report using untagged RelA  
437 protein, it was shown that pppGpp as an allosteric regulator and GDP as substrate synergize  
438 for the maximum enzymatic activity of RelA *in vitro* (Kudrin *et al.*, 2018). Allosteric

439 activation of Rel protein by pppGpp was not restricted to full-length RelA, it has also been  
440 noted for RelQ, an RNA binding small alarmone synthase from *Enterococcus faecalis*  
441 (Beljantseva *et al.*, 2017) and as well as the small alarmone synthase, SAS1, from *Bacillus*  
442 *subtilis* (Steinchen *et al.*, 2015). While RelA is catalytically active as a monomer, SAS1  
443 functions as a homotetramer and tetramerization was found to be important for the allosteric  
444 activation by pppGpp. A pppGpp binding site at the C-terminal region of the Rel enzyme  
445 from *Mycobacterium smegmatis* has been reported (Syal *et al.*, 2015). The physiological  
446 relevance of these findings remain unclear.

447 Our results provide experimental evidence, the first to our knowledge, that at least two levels  
448 of positive control on RelA activation exist *in vivo* (Fig. 7). In addition to the well-studied  
449 ribosome-dependent activation of the RelA catalytic activity by the hungry codons, there is a  
450 positive regulation of the RelA activity by pppGpp and which is likely to be an allosteric  
451 activation. While the activation from amino acid starvation requires RelA interaction with the  
452 ribosome the latter was also evident in the absence of ribosome binding (Fig. 4D). Further  
453 studies are needed to understand the physiological significance of the pppGpp mediated  
454 allosteric activation of RelA. By its very nature, an autocatalytic reaction would result in the  
455 generation of a bistable switch (Dubnau and Losick, 2006). We propose fluctuations in the  
456 SpoT and GppA hydrolase activities could contribute to the non-uniform (p)ppGpp synthesis  
457 in the cells within a population. It has been noted that the formation of persister cells within a  
458 population is associated with these cells having very high levels of (p)ppGpp (Harms *et al.*,  
459 2016).

#### 460 ***SpoT and GppA hydrolases – the negative regulators of the stringent response***

461 Genetic evidence was used to postulate that the essential function of SpoT was the  
462 degradation of (p)ppGpp synthesized by RelA (Xiao *et al.*, 1991) in response to signal(s) the

463 nature of which is not well understood. To our knowledge, this was not experimentally tested.  
464 Our results are in accord with this postulation but have revealed additional layers of  
465 regulation. While (p)ppGpp accumulation was anticipated from the depletion of SpoT, only  
466 ppGpp accumulation was observed, a phenotype reminiscent of that seen following amino  
467 acid starvation in the *spoT1* mutant. Although the molecular basis for this response is not  
468 clear, our results have eliminated the possibility that the pppGpp depletion arose solely from  
469 the activation of GppA, because, if that were to be the case, the pppGpp pool size would be  
470 completely restored in the  $\Delta gppA$  background. However, the pppGpp pool observed in the  
471  $\Delta gppA spoT1$  and  $\Delta gppA \Delta spoT$  strains were less than that observed in the  $\Delta gppA$  mutant  
472 (Fig. 3B lane 2, Fig. 4B lanes 10 – 16). Either the decreased synthesis of pppGpp or an  
473 increased degradation of pppGpp by one or more pppGppase, other than GppA, that was  
474 reported (Somerville and Ahmed, 1979) and references therein) may contribute to the  
475 depletion of pppGpp pool in the *spoT* hydrolase mutant. We favor the latter possibility,  
476 because, increasing the GTP pool did not increase the pppGpp synthesis (Fig. S6). Although  
477 the molecular mechanism is unclear, decrease in the pppGpp pool was an important  
478 adaptation needed to support the growth of strains deficient in *spoT* hydrolase activity.

479 Negative regulation of the stringent response by SpoT, consequent to amino acid starvation  
480 was evident in the  $\Delta rlmD::FRT$  background (a hypomorphic allele with reduced expression  
481 of full-length RelA protein). Apparently, when there are fewer RelA molecules, signaling  
482 through the hungry codons was insufficient to amplify the (p)ppGpp pool faster than their  
483 turn over by the SpoT hydrolase activity (Fig. 2C (iii)). Further studies are needed to  
484 establish and understand the physiological relevance of such a regulation in the *relA*<sup>+</sup>  
485 background. These results do not support the observations made *in vitro* that the uncharged  
486 tRNA's inhibit the SpoT hydrolase activity (Richter, 1980), perhaps because the interaction  
487 between SpoT and uncharged tRNA possible *in vitro* may not occur in the cellular milieu. We

488 propose, this kind of regulation could ensure that the amplification of the stringent response  
489 happens after a quorum of hungry codons is available to be sensed by RelA and tight negative  
490 regulation is maintained below the quorum through the SpoT and GppA hydrolase activities  
491 that lower the basal (p)ppGpp pool and prevent the activation of RelA by the nucleotides.  
492 Since, (p)ppGpp accumulation signals stress, such a regulation would ensure stress related  
493 adaptations are not provoked in response to minor fluctuations in the amino acid pool but  
494 only when there was sufficient starvation to allow a quorum of hungry codons to accumulate.  
495 When the rate of RelA-mediated (p)ppGpp synthesis exceeded the rate of SpoT/GppA  
496 mediated hydrolysis, the (p)ppGpp concentration can increase rapidly aided by the allosteric  
497 activation of RelA by pppGpp.

#### 498 ***Effect of (p)ppGpp versus ppGpp on growth***

499 (p)ppGpp synthesis leads to growth inhibition. It has been reported that, in the absence of  
500 stress, progressively increasing the basal ppGpp level using hydrolase deficient *spoT* mutants  
501 progressively increased the growth inhibition (Fiil *et al.*, 1977; Sarubbi *et al.*, 1988; Xiao *et*  
502 *al.*, 1991). As noted previously (Laffler and Gallant, 1974; Fiil *et al.*, 1977) and as well as in  
503 this study, reduction in the *spoT* hydrolase activity decreased the pppGpp pool and therefore,  
504 the slow growth of the *spoT* hydrolase mutants are primarily due to elevated ppGpp pool and  
505 despite the reduced pppGpp pool. Since the elimination of the GppA activity increased the  
506 pppGpp pool in the SpoT hydrolase deficient strains (Fig 3B, 4B, and 4D), we compared the  
507 relative growth inhibition conferred by ppGpp with that of (p)ppGpp. While (p)ppGpp  
508 accumulation conferred severe and prolonged growth inhibition (Figs. 4A, 5D lane 1, Table  
509 S4) at comparable concentration, growth inhibition by ppGpp was transient (Figs. 6A lanes 9  
510 - 11, 6B, 6C and Table S5). We propose, this could be because the two nucleotides regulate  
511 cellular functions with different efficiencies and which then synergistically contribute to  
512 growth inhibition. For example, it was reported that the inhibition of replication elongation

513 was more pronounced when the basal pppGpp pool was increased (Denapoli *et al.*, 2013)  
514 while RNAP activity was more strongly inhibited by ppGpp (Mechold *et al.*, 2013). Our  
515 results also show that an important function of GppA is to lower the pppGpp pool and  
516 alleviate the gratuitous activation of RelA especially under conditions that lower the SpoT  
517 hydrolase activity. In other words, the SpoT and GppA hydrolases together maintain a low  
518 pppGpp pool so as to prevent the accumulation of (p)ppGpp through the autocatalytic  
519 amplification of basal RelA activity. The molecular mechanism of allosteric activation of  
520 RelA by pppGpp is being investigated.

## 521 **Experimental Procedures.**

### 522 **Growth conditions**

523 LB medium (1% tryptone, 0.5% yeast extract, 1% NaCl), MOPS buffered minimal medium  
524 (Neidhardt *et al.*, 1974) or minimal A medium (Miller, 1992) were used, the latter was  
525 supplemented with 0.5% glucose and 20 amino acids, each at a final concentration of 40  $\mu\text{g}$   
526  $\text{ml}^{-1}$ . In plates, glucose and cas-amino acids were supplemented at 0.2% final concentration.  
527 Antibiotics and the concentrations at which they were used are, ampicillin (Amp), 50  $\mu\text{g}/\text{ml}$ ,  
528 kanamycin (Kan), 25  $\mu\text{g ml}^{-1}$ ; tetracycline (Tet), 10  $\mu\text{g ml}^{-1}$  and chloramphenicol (Cm), 15  $\mu\text{g}$   
529  $\text{ml}^{-1}$ . Isopropyl  $\beta$ -D-thiogalactopyranoside (IPTG) and 5-Bromo-4-chloro 3-indolyl- $\beta$ -D-  
530 thiogalactoside (X-gal) were used at a final concentration of 1 mM and 50  $\mu\text{g ml}^{-1}$ ,  
531 respectively.

### 532 **Construction of strains and plasmids**

533 The strains used in this study are derivatives of the *E. coli* K12 strain MG1655, referred as  
534 wild-type. Strains and primers are listed in Table S1. Mutations were introduced by P1vir  
535 mediated transduction using standard protocols. Gene deletions have been sourced from the  
536 Keio collection (Baba *et al.*, 2006) and when required, the kanamycin resistance cassette was

537 flipped out using FLP recombinase expressed from a pCP20 plasmid (Cherepanov and  
538 Wackernagel, 1995). The plasmid pRC*spoT* is from the lab collection (Nazir and  
539 Harinarayanan, 2016) and was constructed from pRC7 (Bernhardt and De Boer, 2004).  
540 Deletions in the *relA* gene on the chromosome, to generate *relA455Δ::Kan* and  
541 *relA496Δ::Kan*, wherein all codons after 455 and 496 were deleted and replaced with a TAG  
542 stop codon and the kanamycin cassette from pKD13 (Datsenko and Wanner, 2000) was  
543 performed by recombineering (Thomason *et al.*, 2014). Forward primers JGOrelA496aaPS4,  
544 JGOrelA455aaPS4, and the reverse primer JGOrelAPS1 were used. These constructs  
545 generated were verified by sequencing. The transposon insertions *relA::Tn10dTet* and  
546 *rlmD::Tn10dKan* were mapped by inverse PCR (Higashitani *et al.*, 1994). The β-  
547 galactosidase reporter fusions *relA'-lac* and *rlmD'-lac* within the *relA* and *rlmD* genes  
548 respectively, were constructed using the knockout alleles available in the Keio collection and  
549 plasmid pKG137 using a published protocol (Ellermeier *et al.*, 2002). The new junctions  
550 generated were verified by sequencing.

#### 551 **Plasmid loss and viability measurements**

552 Using a published assay (Bernhardt and De Boer, 2004) the ability of strains to grow  
553 following loss of the single-copy, unstable, amp<sup>r</sup>-plasmid pRC*spoT* was assessed in the  $\Delta lac$   
554 genetic background. The plasmid carries the *lacZ* gene. Strains containing the plasmid  
555 pRC*spoT* were grown overnight in LB broth containing ampicillin and IPTG, the latter used  
556 at a final concentration of 1 mM unless mentioned otherwise. Overnight cultures were  
557 washed with minimal A medium and serially diluted to 10<sup>-6</sup> dilution. Dilutions were spread  
558 on IPTG X-gal containing plates to obtain ~300 colonies and incubated for 24 to 72 hours at  
559 37°C depending on the growth medium. Blue and white colonies indicating cells that retained  
560 and lost the plasmid respectively were counted and expressed as the percentage of white  
561 colonies. White colonies were tested for growth on the same medium to confirm viability.

## 562 **The efficiency of plating determination**

563 Strains were grown overnight in the permissive medium. Overnight cultures were washed  
564 with minimal A and serially diluted to  $10^{-6}$  dilution. From each dilution, 10 $\mu$ l was spotted,  
565 allowed to dry and plates incubated at 37°C. To test for RelA function or elevated (p)ppGpp  
566 level, strains were spotted on minimal A medium containing glucose with or without the  
567 amino acids serine (S), methionine (M) and glycine (G) (100  $\mu$ g/ml each). The growth of the  
568 *relA* mutant was inhibited in the presence of SMG (Uzan and Danchin, 1976).

## 569 **Depletion of SpoT**

570 In strains carrying the single-copy plasmid pRC*spoT*, the chromosomal *spoT* gene was  
571 replaced with the  $\Delta spoT::Cm$  or the  $\Delta spoT$  allele. SpoT expression in pRC*spoT* was induced  
572 using IPTG as it was expressed from the *lac* promoter and the plasmid also carried the *lacI*  
573 gene. Cultures grown overnight in the presence of ampicillin and IPTG (1mM) in LB or  
574 MOPS buffered medium containing glucose and 20 amino acids, were washed and sub-  
575 cultured at different dilutions in appropriate liquid medium or plates containing ampicillin  
576 and different concentrations of IPTG or without IPTG.

## 577 **(p)ppGpp estimation by thin layer chromatography**

578 (p)ppGpp estimations were carried out by growing cultures in MOPS buffered medium  
579 containing 0.5% glucose and when necessary the 20 amino acids were added, each to a final  
580 concentration of 40  $\mu$ g/ml. Overnight cultures and the initial growth following dilution were  
581 carried out in the presence of 1.32 mM  $K_2HPO_4$ . At an  $A_{600}$  of  $\sim 0.4$  to 0.5, the cultures were  
582 diluted 10-fold into the low phosphate medium (0.4 mM  $K_2HPO_4$ ) and allowed to undergo at  
583 least two doublings in the presence of 100-200  $\mu$ Ci/ml of  $^{32}P$ - $H_3PO_4$  before sample collection  
584 began at  $\sim 0.2 A_{600}$ . An unlabelled culture was used to monitor  $A_{600}$  at periodic time intervals.  
585 Valine was added at 100  $\mu$ g/ml to induce isoleucine starvation and which was reversed by



586 adding isoleucine at 100 µg/ml. Samples were collected in tubes containing an equal volume  
587 of 2N HCOOH kept chilled on ice. The samples were subjected to three cycles of freeze-thaw  
588 and centrifuged at 10000 rpm for 5 minutes at 4°C and 10 µl of the supernatant was applied  
589 on PEI cellulose sheets and resolved in 1.5M KH<sub>2</sub>PO<sub>4</sub>, pH3.4. The nucleotide spots were  
590 visualized by phosphorimager (Typhoon FLA 9500) and quantified using multi-gauge  
591 software (Fujifilm). The values are expressed as the ratio of a nucleotide (GTP or ppGpp or  
592 pppGpp) to total (GTP + ppGpp + pppGpp).

### 593 **Growth kinetics of amino acid starvation and recovery**

594 Overnight cultures were grown in minimal A glucose medium and sub-cultured in the same  
595 medium in three separate flasks. The cultures were incubated at 37 °C, 200 rpm and growth  
596 was monitored periodically. At OD<sub>600</sub> between 0.15 – 0.25, valine was added to two of the  
597 cultures and 1 hour later isoleucine was added to one of the cultures having valine. Growth  
598 kinetics in the three flasks was compared.

### 599 **Acknowledgment**

600 We acknowledge strains used from the Keio collection (NBRP, Japan). We thank members of  
601 the Laboratory of Bacterial Genetics for their suggestions. We thank Mike Cashel for  
602 providing strains used in this study and suggestions. This work was primarily funded by the  
603 Centre of Excellence in Microbial Biology – Phase 2 research grant of the Department of  
604 Biotechnology, Government of India. R.S is a recipient of DBT-JRF fellowship.

### 605 **Conflict of interest**

606 The authors declare they have no conflict of interest.

607

608 **References**

- 609 An, G., Justesen, J., Watson, R.J., and Friesen, J.D. (1979) Cloning the spoT Gene of  
610 *Escherichia coli* : Identification of the spoT Gene Product. *J Bacteriol* **137**: 1100–1110  
611 <http://jlb.asm.org/content/137/3/1100.full.pdf>.
- 612 Arenz, S., Abdelshahid, M., Sohmen, D., Payoe, R., Starosta, A.L., Berninghausen, O., *et al.*  
613 (2016) The stringent factor RelA adopts an open conformation on the ribosome to stimulate  
614 ppGpp synthesis. *Nucleic Acids Res* **44**: 6471–6481.
- 615 Atkinson, G.C., Tenson, T., and Hauryliuk, V. (2011) The RelA/SpoT homolog (RSH)  
616 superfamily: distribution and functional evolution of ppGpp synthetases and hydrolases  
617 across the tree of life. *PLoS One* **6**: e23479  
618 [http://www.pubmedcentral.nih.gov/articlerender.fcgi?artid=3153485&tool=pmcentrez&rende](http://www.pubmedcentral.nih.gov/articlerender.fcgi?artid=3153485&tool=pmcentrez&rendertype=abstract)  
619 [rtype=abstract](http://www.pubmedcentral.nih.gov/articlerender.fcgi?artid=3153485&tool=pmcentrez&rendertype=abstract).
- 620 Baba, T., Ara, T., Hasegawa, M., Takai, Y., Okumura, Y., Baba, M., *et al.* (2006)  
621 Construction of *Escherichia coli* K-12 in-frame, single-gene knockout mutants: the Keio  
622 collection. *Mol Syst Biol* **2**: 2006.0008  
623 [http://www.pubmedcentral.nih.gov/articlerender.fcgi?artid=1681482&tool=pmcentrez&rende](http://www.pubmedcentral.nih.gov/articlerender.fcgi?artid=1681482&tool=pmcentrez&rendertype=abstract)  
624 [rtype=abstract](http://www.pubmedcentral.nih.gov/articlerender.fcgi?artid=1681482&tool=pmcentrez&rendertype=abstract).
- 625 Barker, M.M., Gaal, T., Josaitis, C.A., and Gourse, R.L. (2001) Mechanism of regulation of  
626 transcription initiation by ppGpp. I. Effects of ppGpp on transcription initiation in vivo and in  
627 vitro. *J Mol Biol* **305**: 673–688  
628 <http://www.ncbi.nlm.nih.gov/pubmed/11162084>  
629 <http://www.ncbi.nlm.nih.gov/pubmed/11162085>.
- 630 Battesti, A., and Bouveret, E. (2006) Acyl carrier protein/SpoT interaction, the switch linking

- 631 SpoT-dependent stress response to fatty acid metabolism. *Mol Microbiol* **62**: 1048–1063.
- 632 Beljantseva, J., Kudrin, P., Andresen, L., Shingler, V., Atkinson, G.C., Tenson, T., and  
633 Haurlyuk, V. (2017) Negative allosteric regulation of *Enterococcus faecalis* small alarmone  
634 synthetase RelQ by single-stranded RNA. *Proc Natl Acad Sci* **114**: 3726–3731  
635 <http://www.pnas.org/lookup/doi/10.1073/pnas.1617868114>.
- 636 Bernhardt, T.G., and Boer, P.A.J. De (2004) Screening for synthetic lethal mutants in  
637 *Escherichia coli* and identification of EnvC (YibP) as a periplasmic septal ring factor with  
638 murein hydrolase activity. *Mol Microbiol* **52**: 1255–1269.
- 639 Braeken, K., Moris, M., Daniels, R., Vanderleyden, J., and Michiels, J. (2006) New horizons  
640 for (p)ppGpp in bacterial and plant physiology. *Trends Microbiol* **14**: 45–54.
- 641 Brown, A., Fernández, I.S., Gordiyenko, Y., and Ramakrishnan, V. (2016) Ribosome-  
642 dependent activation of stringent control. *Nature* **534**: 277–80  
643 <http://dx.doi.org/10.1038/nature17675>.
- 644 Brown, D.R., Barton, G., Pan, Z., Buck, M., and Wigneshweraraj, S. (2014) Nitrogen stress  
645 response and stringent response are coupled in *Escherichia coli*. *Nat Commun* **5**: 1–8  
646 <http://dx.doi.org/10.1038/ncomms5115>.
- 647 Chatterji, D., and Kumar Ojha, A. (2001) Revisiting the stringent response, ppGpp and  
648 starvation signaling. *Curr Opin Microbiol* **4**: 160–165.
- 649 Cherepanov, P.P., and Wackernagel, W. (1995) Gene disruption in *Escherichia coli*: TcR and  
650 KmR cassettes with the option of Flp-catalyzed excision of the antibiotic-resistance  
651 determinant. *Gene* **158**: 9–14.
- 652 Datsenko, K., and Wanner, B.L. (2000) One-step inactivation of chromosomal genes in

- 653 Escherichia coli K-12 using PCR products. *Proc Natl Acad Sci USA* **97**: 6640–6645
- 654 [http://www.pubmedcentral.nih.gov/articlerender.fcgi?artid=18686&tool=pmcentrez&rendert](http://www.pubmedcentral.nih.gov/articlerender.fcgi?artid=18686&tool=pmcentrez&rendertype=abstract)
- 655 [ype=abstract](http://www.pubmedcentral.nih.gov/articlerender.fcgi?artid=18686&tool=pmcentrez&rendertype=abstract).
- 656 Denapoli, J., Tehranchi, A.K., and Wang, J.D. (2013) Dose-dependent reduction of
- 657 replication elongation rate by ( p ) ppGpp in Escherichia coli and Bacillus subtilis. *Mol*
- 658 *Microbiol* **88**: 93–104.
- 659 Dubnau, D., and Losick, R. (2006) Bistability in bacteria. *Mol Microbiol* **61**: 564–572.
- 660 Durfee, T., Hansen, A.M., Zhi, H., Blattner, F.R., and Ding, J.J. (2008) Transcription
- 661 profiling of the stringent response in Escherichia coli. *J Bacteriol* **190**: 1084–1096.
- 662 Ellermeier, C.D., Janakiraman, A., and Slauch, J.M. (2002) Construction of targeted single
- 663 copy lac fusions using  $\lambda$  Red and FLP-mediated site-specific recombination in bacteria. *Gene*
- 664 **290**: 153–161.
- 665 Ferullo, D.J., and Lovett, S.T. (2008) The stringent response and cell cycle arrest in
- 666 Escherichia coli. *PLoS Genet* **4**: 21–23.
- 667 Fiil, N.P., Willumsen, B.M., Friesen, J.D., and Meyenburg, K. von (1977) Interaction of
- 668 alleles of the relA, relC and spoT genes in Escherichia coli: Analysis of the interconversion
- 669 of GTP, ppGpp and pppGpp. *MGG Mol Gen Genet* **150**: 87–101.
- 670 Hamel, E., and Cashel, M. (1974) Guanine nucleotides in protein synthesis. Utilization of
- 671 pppGpp and dGTP by initiation factor 2 and elongation factor Tu. *Arch Biochem Biophys*
- 672 **162**: 293–300.
- 673 Harat, A., and Sy, J. (1983) Guanosine 5'-Triphosphate, 3'-Diphosphate 5'-
- 674 Phosphohydrolase: Purification and substrate specificity. *J Biol Chem* **258**: 1678–1683.

- 675 Harms, A., Maisonneuve, E., and Gerdes, K. (2016) Mechanisms of bacterial persistence  
676 during stress and antibiotic exposure. *Science (80- )* **354**: aaf42681-9  
677 <http://www.sciencemag.org/cgi/doi/10.1126/science.aaf4268>.
- 678 Hauryliuk, V., Atkinson, G.C., Murakami, K.S., Tenson, T., and Gerdes, K. (2015) Recent  
679 functional insights into the role of (p)ppGpp in bacterial physiology. *Nat Rev Microbiol* **13**:  
680 298–309 <http://dx.doi.org/10.1038/nrmicro3448>. Accessed April 14, 2015.
- 681 Heinemeyer, E., and Richter, D. (1978) Characterization of the Guanosine 5'-Triphosphate  
682 3'-Diphosphate and Guanosine 5'-Diphosphate 3'-Diphosphate Degradation Reaction  
683 Catalyzed by a Specific Pyrophosphorylase from Escherichia coli. *Biochemistry* **17**: 5368–  
684 5372.
- 685 Higashitani, A., Higashitani, N., Yasuda, S., and Horiuchi, K. (1994) A general and fast  
686 method for mapping mutations on the Escherichia coli chromosome. *Nucleic Acids Res* **22**:  
687 2426–2427.
- 688 Jiang, M., Sullivan, S.M., Wout, P.K., and Maddock, J.R. (2007) G-protein control of the  
689 ribosome-associated stress response protein SpoT. *J Bacteriol* **189**: 6140–6147.
- 690 Joseleau-Petit, D., Vinella, D., and D'Ari, R. (1999) Metabolic alarms and cell division in  
691 Escherichia coli. *J Bacteriol* **181**: 9–14.
- 692 Kanjee, U., Ogata, K., and Houry, W.A. (2012) Direct binding targets of the stringent  
693 response alarmone (p)ppGpp. *Mol Microbiol* **85**: 1029–1043.
- 694 Kari, C., Török, I., and Travers, A. (1977) ppGpp cycle in Escherichia coli. *MGG Mol Gen*  
695 *Genet* **150**: 249–255.
- 696 Keasling, J.D., Bertsch, L., and Kornberg, A. (1993) Guanosine pentaphosphate

- 697 phosphohydrolase of *Escherichia coli* is a long-chain exopolyphosphatase. *Proc Natl Acad*  
698 *Sci U S A* **90**: 7029–33.  
699 <http://www.ncbi.nlm.nih.gov/pmc/articles/PMC47069/pdf/pnas01472-0144.pdf>.
- 700 Kudrin, P., Dzhygyr, I., Ishiguro, K., Beljantseva, J., Maksimova, E., Oliveira, S.R.A., *et al.*  
701 (2018) The ribosomal A-site finger is crucial for binding and activation of the stringent factor  
702 RelA. *Nucleic Acids Res* **46**: 1973–1983 [https://academic.oup.com/nar/advance-](https://academic.oup.com/nar/advance-article/doi/10.1093/nar/gky023/4829690)  
703 [article/doi/10.1093/nar/gky023/4829690](https://academic.oup.com/nar/advance-article/doi/10.1093/nar/gky023/4829690).
- 704 Laffler, T., and Gallant, J. (1974) SPOT , a New Genetic Locus Involved in the Stringent  
705 Response in *E. coli*. *Cell* **1**: 27–30.
- 706 Leavitt, R., and Umbarger, H.E. (1961) Isoleucine and Valine Metabolism in *Escherichia*  
707 *Coli*. *J Bacteriol* **83**: 624–630.
- 708 Loveland, A.B., Bah, E., Madireddy, R., Zhang, Y., Brilot, A.F., Grigorieff, N., and  
709 Korostelev, A.A. (2016) Ribosome.RelA structures reveal the mechanism of stringent  
710 response activation. *Elife* **5**: e17029.
- 711 Magnusson, L.U., Farewell, A., and Nyström, T. (2005) ppGpp: A global regulator in  
712 *Escherichia coli*. *Trends Microbiol* **13**: 236–242.
- 713 Mechold, U., Potrykus, K., Murphy, H., Murakami, K.S., and Cashel, M. (2013) Differential  
714 regulation by ppGpp versus pppGpp in *Escherichia coli*. *Nucleic Acids Res* **41**: 6175–6189.
- 715 Metzger, S., Dror, I.B., Aizenman, E., Schreiber, G., Toone, M., Friesen, J.D., *et al.* (1988)  
716 The nucleotide sequence and characterization of the relA gene of *Escherichia coli*. *J Biol*  
717 *Chem* **263**: 15699–704 <http://www.ncbi.nlm.nih.gov/pubmed/2844820>.
- 718 Metzger, S., Schreiber, G., Aizenman, E., Cashel, M., and Glaser, G. (1989) Characterization

- 719 of the relA1 mutation and a comparison of relA1 with new relA null alleles in Escherichia  
720 coli. *J Biol Chem* **264**: 21146–21152.
- 721 Miller, D.L., Cashel, M., and Weissbach, H. (1973) The interaction of guanosine 5'-  
722 diphosphate, 2' (3')-diphosphate with the bacterial elongation factor Tu. *Arch Biochem*  
723 *Biophys* **154**: 675–682.
- 724 Miller, J.H. (1992) *A short course in bacterial genetics: A laboratory manual and handbook*  
725 *for and related bacteria*. Cold Spring Harbor Laboratory Press, .
- 726 Milon, P., Tischenko, E., Tomsic, J., Caserta, E., Folkers, G., Teana, A. La, *et al.* (2006) The  
727 nucleotide-binding site of bacterial translation initiation factor 2 (IF2) as a metabolic sensor.  
728 *Proc Natl Acad Sci U S A* **103**: 13962–7 <http://www.pnas.org/content/103/38/13962.long>.
- 729 Mittenhuber, G. (2001) Comparative genomics and evolution of genes encoding bacterial  
730 (p)ppGpp synthetases/hydrolases (the Rel, RelA and SpoT proteins). *J Mol Microbiol*  
731 *Biotechnol* **3**: 585–600  
732 [http://www.ncbi.nlm.nih.gov/sites/entrez?db=PubMed&cmd=retrieve&dopt=AbstractPlus&li](http://www.ncbi.nlm.nih.gov/sites/entrez?db=PubMed&cmd=retrieve&dopt=AbstractPlus&list_uids=11545276%5Cnpapers2://publication/uuid/2F1746BF-5E50-456B-9BC5-A709DE6050A7)  
733 [st\\_uids=11545276%5Cnpapers2://publication/uuid/2F1746BF-5E50-456B-9BC5-](http://www.ncbi.nlm.nih.gov/sites/entrez?db=PubMed&cmd=retrieve&dopt=AbstractPlus&list_uids=11545276%5Cnpapers2://publication/uuid/2F1746BF-5E50-456B-9BC5-A709DE6050A7)  
734 [A709DE6050A7](http://www.ncbi.nlm.nih.gov/sites/entrez?db=PubMed&cmd=retrieve&dopt=AbstractPlus&list_uids=11545276%5Cnpapers2://publication/uuid/2F1746BF-5E50-456B-9BC5-A709DE6050A7).
- 735 Nakagawa, A., Oshima, T., and Mori, H. (2006) Identification and characterization of a  
736 second, inducible promoter of relA in Escherichia coli. *Genes Genet Syst* **81**: 299–310.
- 737 Nazir, A., and Harinarayanan, R. (2016) Inactivation of cell division protein FtsZ by SulA  
738 makes Lon indispensable for the viability of a ppGpp0 strain of Escherichia coli. *J Bacteriol*  
739 **198**: 688–700.
- 740 Neidhardt, F.C., Bloch, P.L., and Smith, D.F. (1974) Culture medium for enterobacteria. *J*  
741 *Bacteriol* **119**: 736–747.

- 742 Paul, B.J., Barker, M.M., Ross, W., Schneider, D.A., Webb, C., Foster, J.W., and Gourse,  
743 R.L. (2004) DksA: A critical component of the transcription initiation machinery that  
744 potentiates the regulation of rRNA promoters by ppGpp and the initiating NTP. *Cell* **118**:  
745 311–322.
- 746 Paul, B.J., Berkmen, M.B., and Gourse, R.L. (2005) DksA potentiates direct activation of  
747 amino acid promoters by ppGpp. *Proc Natl Acad Sci* **102**: 7823–7828  
748 <http://dx.doi.org/10.1073/pnas.0501170102>.
- 749 Pesavento, C., and Hengge, R. (2009) Bacterial nucleotide-based second messengers. *Curr*  
750 *Opin Microbiol* **12**: 170–176.
- 751 Petersen, C. (1999) Inhibition of cellular growth by increased guanine nucleotide pools. *J*  
752 *Biol Chem* **274**: 5348–5356  
753 <http://www.ncbi.nlm.nih.gov/entrez/query.fcgi?cmd=Retrieve&db=PubMed&dopt=Citation>  
754 [http://www.ncbi.nlm.nih.gov/entrez/query.fcgi?cmd=Retrieve&db=PubMed&dopt=Citation](http://www.ncbi.nlm.nih.gov/entrez/query.fcgi?cmd=Retrieve&db=PubMed&dopt=Citation&list_uids=10026143)  
&list\_uids=10026143.
- 755 Potrykus, K., and Cashel, M. (2008) (p)ppGpp: Still Magical? \*. *Annu Rev Microbiol* **62**: 35–  
756 51 <http://www.annualreviews.org/doi/10.1146/annurev.micro.62.081307.162903>.
- 757 Potrykus, K., Murphy, H., Philippe, N., and Cashel, M. (2011) ppGpp is the major source of  
758 growth rate control in *E. coli*. *Environ Microbiol* **13**: 563–575.
- 759 Richter, D. (1980) Uncharged tRNA inhibits guanosine 3',5'-bis (diphosphate) 3'-  
760 pyrophosphohydrolase [ppGppase], the spoT gene product, from *Escherichia coli*. *Mol Gen*  
761 *Genet* **178**: 325–7 <http://www.ncbi.nlm.nih.gov/pubmed/6156378>.
- 762 Rojas, A.M., Ehrenberg, M., Andersson, S.G.E., and Kurland, C.G. (1984) ppGpp inhibition  
763 of elongation factors Tu, G and Ts during polypeptide synthesis. *MGG Mol Gen Genet* **197**:  
764 36–45.



- 765 Ross, W., Sanchez-Vazquez, P., Chen, A.Y., Lee, J.H., Burgos, H.L., and Gourse, R.L.  
766 (2016) ppGpp Binding to a Site at the RNAP-DksA Interface Accounts for Its Dramatic  
767 Effects on Transcription Initiation during the Stringent Response. *Mol Cell* **62**: 811–823  
768 <http://dx.doi.org/10.1016/j.molcel.2016.04.029>.
- 769 Ross, W., Vrentas, C.E., Sanchez-Vazquez, P., Gaal, T., and Gourse, R.L. (2013) The magic  
770 spot: A ppGpp binding site on E. coli RNA polymerase responsible for regulation of  
771 transcription initiation. *Mol Cell* **50**: 420–429 <http://dx.doi.org/10.1016/j.molcel.2013.03.021>.
- 772 Sajish, M., Kalayil, S., Verma, S.K., Nandicoori, V.K., and Prakash, B. (2009) The  
773 significance of EXDD and RXKD motif conservation in Rel proteins. *J Biol Chem* **284**:  
774 9115–9123.
- 775 Sarubbi, E., Rudd, E., Xiao, H., Ikeharat, K., Kalman, M., and Cashell, M. (1989)  
776 Characterization of the spoT gene of Escherichia coli. *J Biol Chem* **264**: 15074–15082.
- 777 Sarubbi, E., Rudd, K.E., and Cashel, M. (1988) Basal ppGpp level adjustment shown by new  
778 spoT mutants affect steady state growth rates and rrnA ribosomal promoter regulation in  
779 Escherichia coli. *MGG Mol Gen Genet* **213**: 214–222.
- 780 Schreiber, G., Metzger, S., Aizenman, E., Roza, S., Cashel, M., and Glaser, G. (1991)  
781 Overexpression of the relA gene in Escherichia coli. *J Biol Chem* **266**: 3760–3767.
- 782 Schreiber, G., Ron, E.Z., and Glaser, G. (1995) ppGpp-Mediated Regulation of DNA  
783 Replication and Cell Division in. *Curr Microbiol* **30**: 27–32.
- 784 Seyfzadeh, M., Keener, J., and Nomura, M. (1993) spoT-dependent accumulation of  
785 guanosine tetraphosphate in response to fatty acid starvation in *Escherichia coli*. *Proc Natl*  
786 *Acad Sci U S A* **90**: 11004–11008.

- 787 Shyp, V., Tankov, S., Ermakov, A., Kudrin, P., English, B.P., Ehrenberg, M., *et al.* (2012)  
788 Positive allosteric feedback regulation of the stringent response enzyme RelA by its product.  
789 *EMBO Rep* **13**: 835–839 <http://embor.embopress.org/cgi/doi/10.1038/embor.2012.106>.
- 790 Somerville, C.R., and Ahmed, A. (1979) Mutants of Escherichia coli Defective in the  
791 Degradation of Guanosine 5'-Triphosphate, 3'-Diphosphate ( pppGpp ). *MGG* **169**: 315–  
792 323.
- 793 Steinchen, W., Schuhmacher, J.S., Altegoer, F., Fage, C.D., Srinivasan, V., Linne, U., *et al.*  
794 (2015) Catalytic mechanism and allosteric regulation of an oligomeric (p)ppGpp synthetase  
795 by an alarmone. *Proc Natl Acad Sci U S A* **112**: 13348–53  
796 <http://www.ncbi.nlm.nih.gov/pubmed/26460002>  
797 <http://www.pubmedcentral.nih.gov/articlerender.fcgi?artid=PMC4629338>.
- 798 Svitils, A.L., Cashel, M., and Zyskind, J.W. (1993) Guanosine tetraphosphate inhibits  
799 protein synthesis in vivo. *J Biol Chem* **268**: 2307–2311.
- 800 Syal, K., Joshi, H., Chatterji, D., and Jain, V. (2015) Novel pppGpp binding site at the C-  
801 terminal region of the Rel enzyme from Mycobacterium smegmatis. *FEBS J* **282**: 3773–3785.
- 802 Thomason, L.C., Sawitzke, J.A., Li, X., Costantino, N., and Court, D.L. (2014)  
803 Recombineering: Genetic engineering in bacteria using homologous recombination. *Curr*  
804 *Protoc Mol Biol* 10.1002/0471142727.mb0116s106.
- 805 Traxler, M.F., Zacharia, V.M., Marquardt, S., Summers, S.M., Nguyen, T., Stark, S.E., and  
806 Conway, T. (2012) Discretely calibrated regulatory loops controlled by ppGpp partition gene  
807 induction across the 'feast to famine' gradient in Escherichia coli. *Mol Microbiol* **79**: 830–  
808 845.
- 809 Uzan, M., and Danchin, A. (1976) A rapid test for the RelA mutation in E. coli. *Biochem*

810 *Biophys Res Commun* **69**: 751–758.

811 Vinella, D., Albrecht, C., Cashel, M., and D'Ari, R. (2005) Iron limitation induces SpoT-  
812 dependent accumulation of ppGpp in *Escherichia coli*. *Mol Microbiol* **56**: 958–970.

813 Wang, J.D., Sanders, G.M., and Grossman, A.D. (2007) Nutritional Control of Elongation of  
814 DNA Replication by (p)ppGpp. *Cell* **128**: 865–875.

815 Wendrich, T.M., Blaha, G., Wilson, D.N., Marahiel, M.A., and Nierhaus, K.H. (2002)  
816 Dissection of the mechanism for the stringent factor RelA. *Mol Cell* **10**: 779–788.

817 Xiao, H., Kalman, M., Ikehara, K., Zemel, S., Glaser, G., and Cashel, M. (1991) Residual  
818 guanosine 3',5'-bispyrophosphate synthetic activity of relA null mutants can be eliminated by  
819 spoT null mutations. *J Biol Chem* **266**: 5980–5990.

820 Zuo, Y., Wang, Y., and Steitz, T.A. (2013) The Mechanism of *E. coli* RNA Polymerase  
821 Regulation by ppGpp is suggested by the structure of their complex. *Mol Cell* **50**: 430–436  
822 <http://dx.doi.org/10.1016/j.molcel.2013.03.020>.

## 823 **Figure Legends**

824 **Figure 1 - Depletion of SpoT is associated with growth retardation and accumulation of**  
825 **ppGpp, but not pppGpp.**

826 **A.**  $\Delta spoT/pRCspoT$  (RS260) strain cultured in MOPS buffered medium with glucose, 20  
827 amino acids, ampicillin and 1mM IPTG was washed and sub-cultured in the same medium  
828 with (●, ■) or without (▽, ◇) IPTG at the dilutions indicated and the growth was  
829 monitored. **B.**  $\Delta spoT::Cm/pRCspoT$  (RS14) was sub-cultured in the same medium used for  
830 Fig. 1A at the indicated dilutions. Growth after the subculture into the medium containing the  
831  $^{32}\text{P-H}_3\text{PO}_4$  is shown, the solid arrows indicate the time points at which the samples were

832 collected for (p)ppGpp estimation. **C.** Samples collected as shown in Fig. 1B were subjected  
833 to PEI-TLC. Valine-induced stringent response in the wild type is provided as a reference  
834 (lane 1). Ratios of a nucleotide to the total (GTP+ppGpp+pppGpp) was calculated for each  
835 lane. **D.** Strain  $\Delta spoT/pRCspoT$  (RS260) was cultured after  $10^3$ -fold dilution in MOPS  
836 glucose medium containing ampicillin and with (+) or without (–) IPTG, the stringent  
837 response was induced with valine (arrow), samples were collected immediately before valine  
838 addition or subsequently at the time indicated.

839 **Figure 2 - Hypomorphic *relA* alleles suppress the  $\Delta spoT$  growth defect.**

840 **A.** Cartoon of the transposon insertions *rlmD::Tn10dKan* and *relA496::Tn10dTet*. Bent  
841 arrows represent known or annotated promoters, arrow within the transposon indicate the  
842 direction of transcription of the antibiotic marker. **B.** Segregation of the unstable plasmid  
843 *pRCspoT* was assayed as described in the methods. Relevant genotype of the strain, the  
844 percentage of white colonies and the total number of colonies (blue + white) used to calculate  
845 the ratio are indicated. **C.** Strains whose relevant genotypes are indicated were cultured in  
846 MOPS glucose medium, isoleucine starvation was induced with valine (arrow) and samples  
847 were collected immediately before valine addition and subsequently at the times indicated  
848 above the lanes and subjected to PEI-TLC. The line between lanes in the TLC indicates that  
849 internal lanes from a single TLC have been removed.

850 **Figure 3 - SpoT depletion in the *gppA* mutant was associated with severe growth**  
851 **inhibition, depletion of GTP and accumulation of ppGpp and pppGpp**

852 **A. (i).**  $\Delta spoT/pRCspoT$  (RS260) and  $\Delta spoT \Delta gppA::Kan/pRCspoT$  (RS478) strains cultured  
853 in the MOPS buffered medium containing glucose, 20 amino acids, ampicillin and 1mM  
854 IPTG were washed and sub-cultured in the same medium with (○,△) or without (●,▼)  
855 IPTG at the dilutions indicated and the growth monitored **A. (ii)**  $\Delta spoT::Cm/pRCspoT$  (RS14)

856 and  $\Delta spoT::Cm \Delta gppA::Kan/pRCspoT$  (RS206) strains cultured in LB containing ampicillin  
857 and 1mM IPTG were washed, serially diluted in LB medium and the dilutions spotted on LB  
858 agar plates containing Amp and 100  $\mu$ M, 10  $\mu$ M or no IPTG and incubated for 16 hr at 37°C.  
859 **B.**  $\Delta spoT::Cm \Delta gppA::Kan/pRCspoT$  (RS206) cultured in the medium described in 3A (i)  
860 was diluted 200-fold in the same medium or without IPTG and sampled after at least two  
861 divisions in the presence of P<sup>32</sup> (arrows in Fig. S7) and subjected to TLC. The samples were  
862 part of a single TLC with the lanes in between deleted.

863 **Figure 4 – Lowering the SpoT hydrolase activity in the absence of GppA function**  
864 **conferred growth arrest from gratuitous RelA activation.**

865 **A.** The loss or retention of the unstable plasmid  $pRCspoT$  was assayed as described in the  
866 methods. Relevant genotype of the strain, the percentage of white colonies and the total  
867 number of colonies (blue+white) used to calculate the ratio are indicated. The panels within a  
868 column represent single genotype. LB and minimal glucose cas-amino acids plates were  
869 incubated at 37°C for 24 hours and minimal glucose plates for 48 hours. **B.** Stringent  
870 nucleotides pool was measured by TLC following growth in the presence of P<sup>32</sup>. Overnight  
871 cultures of  $spoTI/pRCspoT$  (RS40) (Lanes 1 – 8) and  $spoTI \Delta gppA/ pRCspoT$  (RS194)  
872 (Lanes 9 – 16) were grown in MOPS medium containing glucose and ampicillin in the  
873 presence or absence of IPTG as indicated after 1 in 1000 dilution. Amino acid starvation was  
874 induced with valine (arrow) and samples collected just before or subsequently at the indicated  
875 time. **C.** Plasmid segregation was studied in strains whose relevant genotypes are indicated  
876 and as described in methods. **D.** Stringent nucleotides pool was measured by TLC for the  
877 strains whose relevant genotypes are indicated. Cultures were inoculated at 1:1000 dilution in  
878 MOPS medium containing glucose, 20 amino acids and ampicillin with or without IPTG as  
879 indicated below the lanes and at least two doubling were allowed in the presence of P<sup>32</sup>.

880 **Figure 5 - (p)ppGpp degradation is reduced by elevated pppGpp.**

881 **A.** TLC was performed for wild-type and  $\Delta gppA::FRT$  (RS307, white colony) strains grown  
882 in MOPS glucose. Isoleucine starvation was induced with valine (arrow, solid line), and  
883 reversed by isoleucine addition (arrow, dotted line) and samples were collected at the  
884 indicated time and just before valine addition (lanes 1&7). **B.** The ratio of a nucleotide to  
885 total (GTP + ppGpp + pppGpp) was plotted for the samples collected before or after valine  
886 (Val) or after valine and isoleucine (Ile) addition. Time after valine and subsequent isoleucine  
887 addition are indicated below the bars. Data provided are the mean of two independent  
888 experiments along with the standard deviation of the mean. **C.** TLC was performed for the  
889 *spoT1* strain (RS24); growth condition and sample collection are as described in 5A. **D.**  
890 *spoT1*  $\Delta gppA/pRCspoT$  (RS194) strain was grown in the MOPS glucose medium containing  
891 ampicillin and 1mM IPTG and sub-cultured 1 in1000 in the same medium but without IPTG.  
892 Following growth inhibition, TLC was performed as described in Fig. 5A. **E.** The ratio of a  
893 nucleotide to the total was plotted from the TLC's shown in Fig. 5C and Fig. 5D. Sample  
894 collection times are indicated below the bars.

895 **Figure 6 - Accumulation of ppGpp is associated with transient growth arrest.**

896 **A.** TLC was performed for the strain  $\Delta rlmD \Delta spoT$  (RS361, white colony); growth and  
897 sampling are as described for fig. 5A. **B.** The nucleotide pools were quantified from the TLC  
898 shown in Fig. 6A as described in Fig. 5B. **C.** Growth inhibition after valine addition (arrow,  
899 solid line) and recovery after isoleucine addition (arrow, dotted line) were determined for the  
900  $\Delta rlmD \Delta spoT$  strain (RS361, white colony).

901

902

903 **Figure 7 - A model based on the results of this study.**

904 RelA activation from amino acid starvation is well established while the signals responsible  
905 for basal RelA activity are not clear. The stringent nucleotides generated are turned over by  
906 the SpoT and GppA hydrolases. When the SpoT hydrolase activity is lowered, two or more  
907 activities prevent the accumulation of pppGpp, one is GppA, the nature of the other one is  
908 unclear. The GppA and SpoT hydrolase activities together prevent the activation of RelA-  
909 mediated stringent response and growth arrest. The preeminent contribution of pppGpp to the  
910 activation of stringent response is because of the inhibition of the SpoT mediated degradation  
911 of (p)ppGpp and the allosteric activation of RelA (thick arrow); ppGpp may also  
912 allosterically activate RelA. See text for details. Ndk – Nucleoside diphosphate kinase. An  
913 arrow indicates activation or products of a biochemical activity, a line ending with a ‘⊥’  
914 indicates inhibition. A thick arrow refers to the strength /importance of the pathway.

915 **Supporting information.**

916 **S1 Table.** List of strains, plasmids, and primers.

917 **S2 Table.** The ratio of the nucleotide to total in the WT and  $\Delta gppA$  mutant following amino  
918 acid starvation and reversal of starvation.

919 **S3 Table.** The ratio of the nucleotide to total in the *spoT1* mutant following amino acid  
920 starvation and reversal of starvation.

921 **S4 Table.** The ratio of the nucleotide to total in the *spoT1*  $\Delta gppA$ /pRC*spoT* strain after SpoT  
922 depletion and followed by amino acid starvation and reversal of starvation.

923 **S5 Table.** The ratio of nucleotides to total in the  $\Delta rlmD::FRT$   $\Delta spoT$  strain following amino  
924 acid starvation and the reversal of starvation.

925 **SI references.**

926 **Fig. S1.** SpoT depletion in the  $\Delta relA \Delta spoT/pRCspoT$  strain. The  $\Delta relA \Delta spoT$  (*spoT212*)/  
927 pRCspoT (AN120) strain cultured overnight in MOPS medium containing glucose, 20 amino  
928 acids, ampicillin and 1mM IPTG was washed and sub-cultured at the dilution indicated in the  
929 same medium (●) or without IPTG (○).

930 **Fig. S2.** RelA-dependent accumulation of ppGpp but not pppGpp in the *spoT1* strain. *spoT1*  
931 (RS24) and  $\Delta relA::Kan spoT1$  (RS485, white colony) strains were cultured in MOPS glucose  
932 medium and isoleucine starvation was induced with valine.

933 **Fig. S3.** SMG resistance of the hypomorphic RelA alleles is modulated by SpoT function.  
934 Saturated cultures were washed, serially diluted and spotted on plates with or without SMG  
935 (SMG refers to serine, methionine, and glycine; see methods) and photographed after 20 hrs  
936 at 37°C. Strains and their relevant genotypes are indicated. \* growth in the presence of SMG  
937 was retarded but not abolished.

938 **Fig. S4.** The effect of *spoT* and *gppA* deletions on the growth of the *relA1* strain. Growth was  
939 monitored by streaking the indicated strains on Minimal glucose SMG plates and incubating  
940 them for the time indicated (A) or in other plates as indicated (B). LB and Minimal Glucose  
941 CAA plates were incubated for 24 hours and Minimal glucose plates were incubated for 48  
942 hours. The strains were MG1655, *relA1* (RS39), *relA1 ΔspoT* (RS31 white colony), and *relA1*  
943  $\Delta spoT \Delta gppA::Kan$  (RS35 white colony).

944 **Fig. S5.** Expression levels of *relA'-lac* and *rlmD'-lac* fusions in LB.  $\beta$ -galactosidase assay  
945 was carried out from mid-log phase cultures of the strains RS692 (*relA'-lac*) and RS693  
946 (*rlmD'-lac*) grown in LB. The  $\beta$ -galactosidase activity in Miller units was plotted on a log



947 scale. Values obtained from three independent experiments were used to calculate the mean  
948 and standard deviation.

949 **Fig. S6.** The absence of pppGpp accumulation in the *spoT1* strain is not corrected by an  
950 increase in the GTP level. The *spoT1 gsk3* (RS697 white colony) strain was cultured in  
951 MOPS glucose medium containing histidine, tryptophan (each at 100  $\mu\text{g/ml}$ ) without  
952 guanosine (lanes 1 to 4) and with guanosine (lanes 5 to 8). Isoleucine starvation was induced  
953 by the addition of valine (indicated by arrow). Samples were collected immediately before  
954 valine addition or subsequently at the time indicated.

955 **Fig. S7.** SpoT depletion in *spoT207::Cm  $\Delta gppA::\text{Kan/pRC}spoT$*  (RS206). The *spoT207::Cm*  
956  *$\Delta gppA::\text{Kan/pRC}spoT$*  (RS206) grown in MOPS medium containing glucose, 20 amino acids,  
957 ampicillin and 1mM IPTG was washed and sub-cultured in the same medium (●) or without  
958 (○) IPTG at the dilution indicated. Growth after the sub-culture into the medium containing  
959  $^{32}\text{P-H}_3\text{PO}_4$  is shown. The arrows refer to the points at which samples were collected for the  
960 TLC shown in Fig. 3B.

961 **Fig. S8.** Growth inhibition by valine and the recovery after isoleucine addition were assayed  
962 in **A.** MG1655, **B.** *spoT1* (RS24), and **C.**  *$\Delta rlmD$*  (RS316). Valine (solid arrow) and isoleucine  
963 (dashed arrow) were added as indicated.

**Fig. 1**

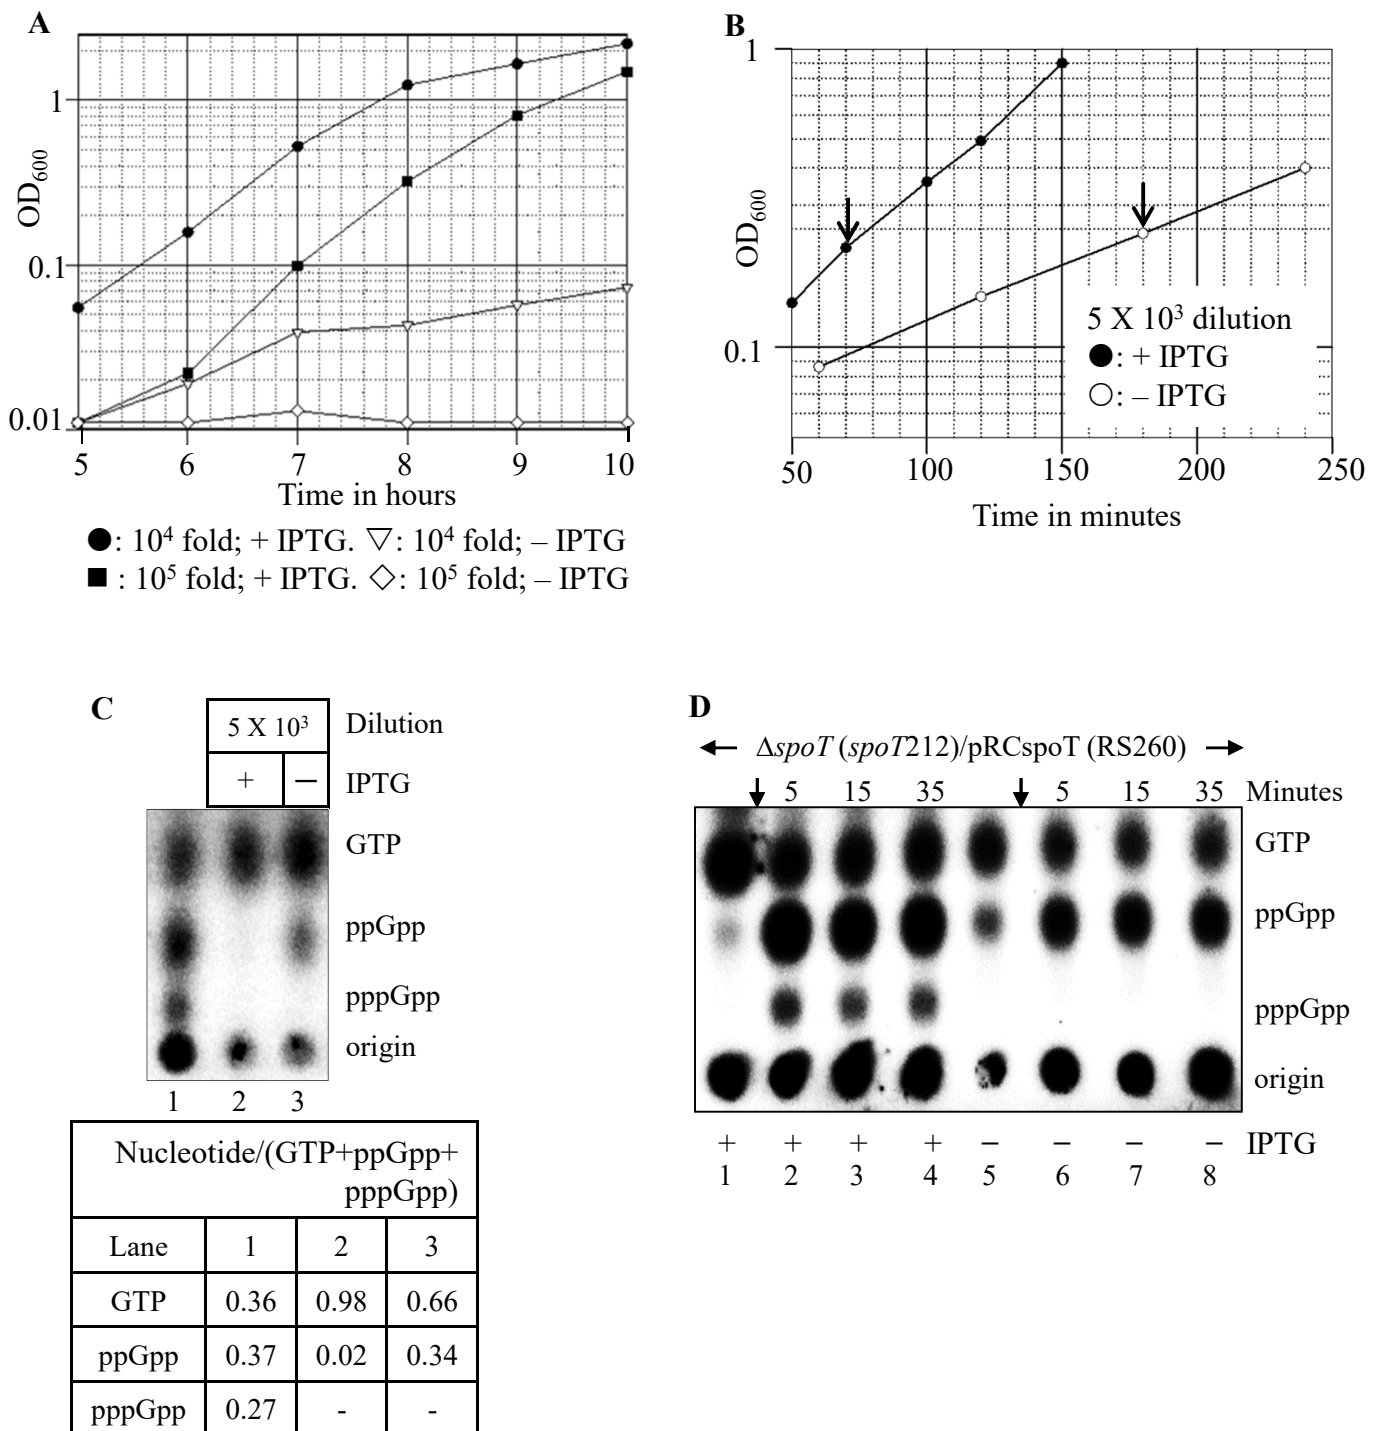

Fig. 2

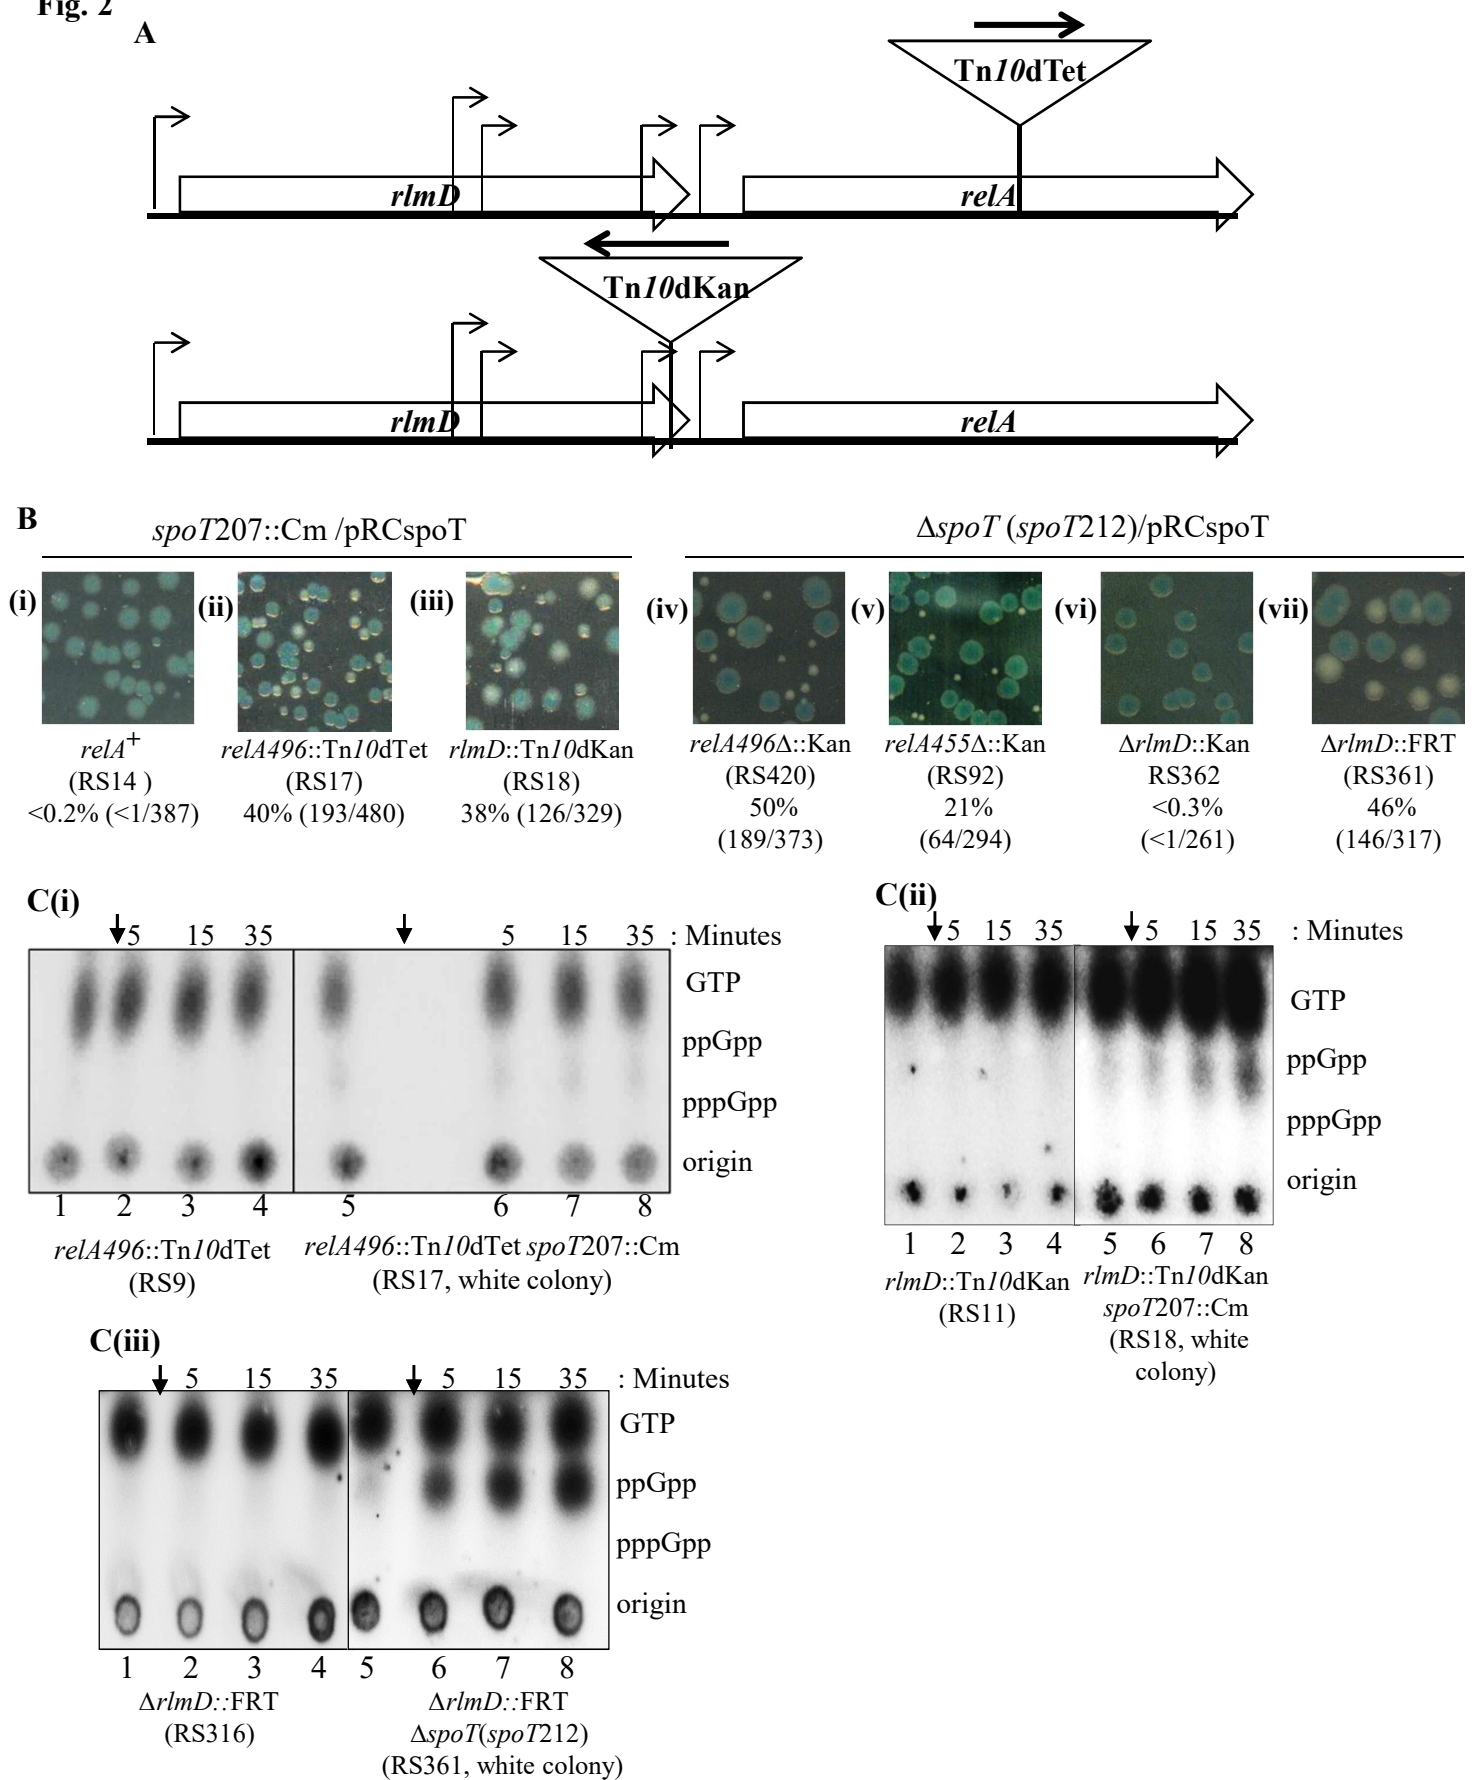

**Fig. 3**

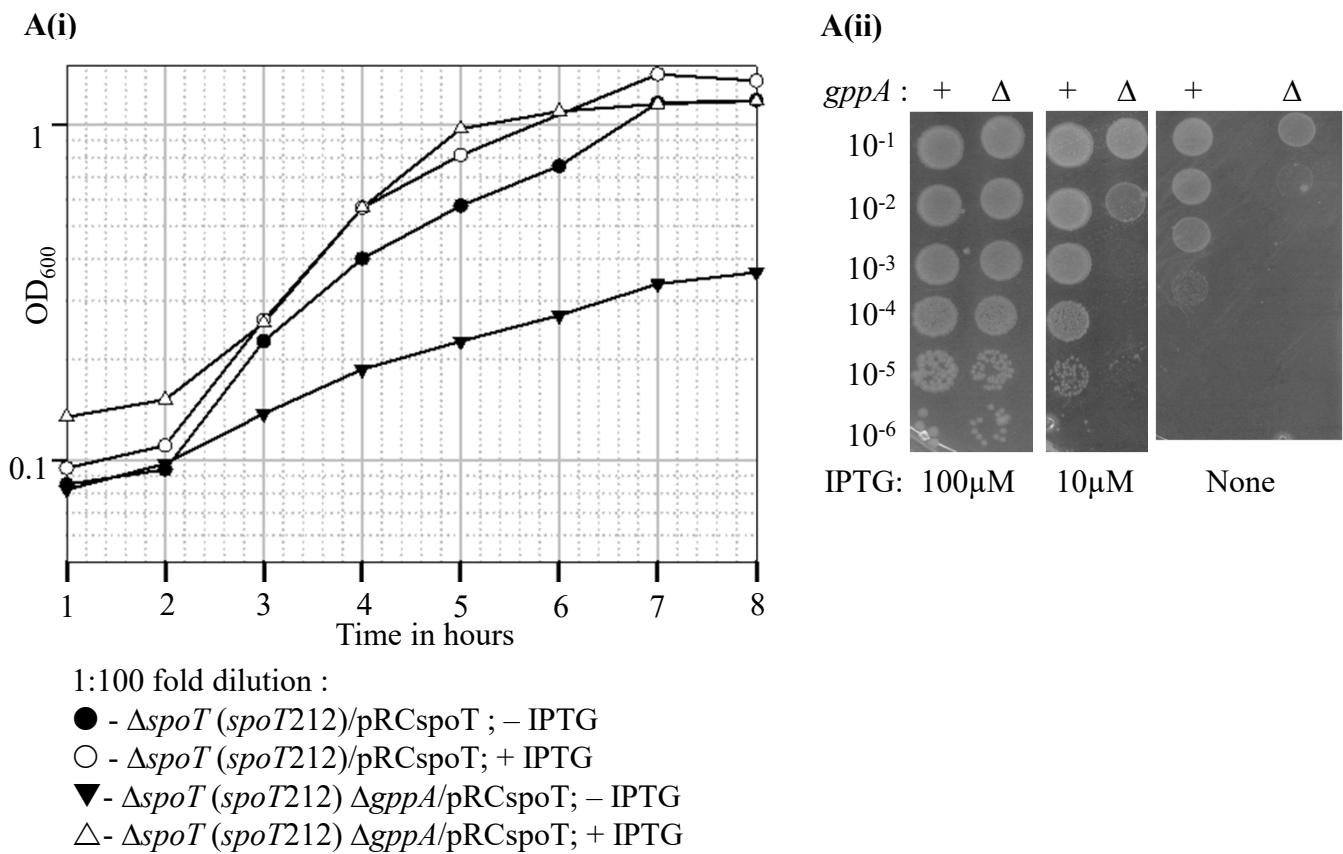

**B**

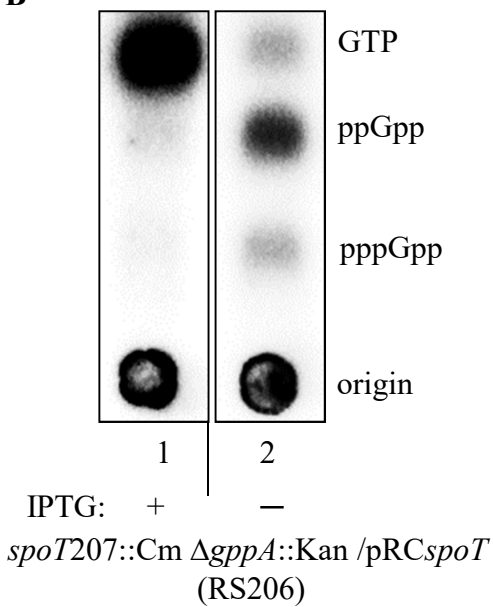

**Fig. 4**

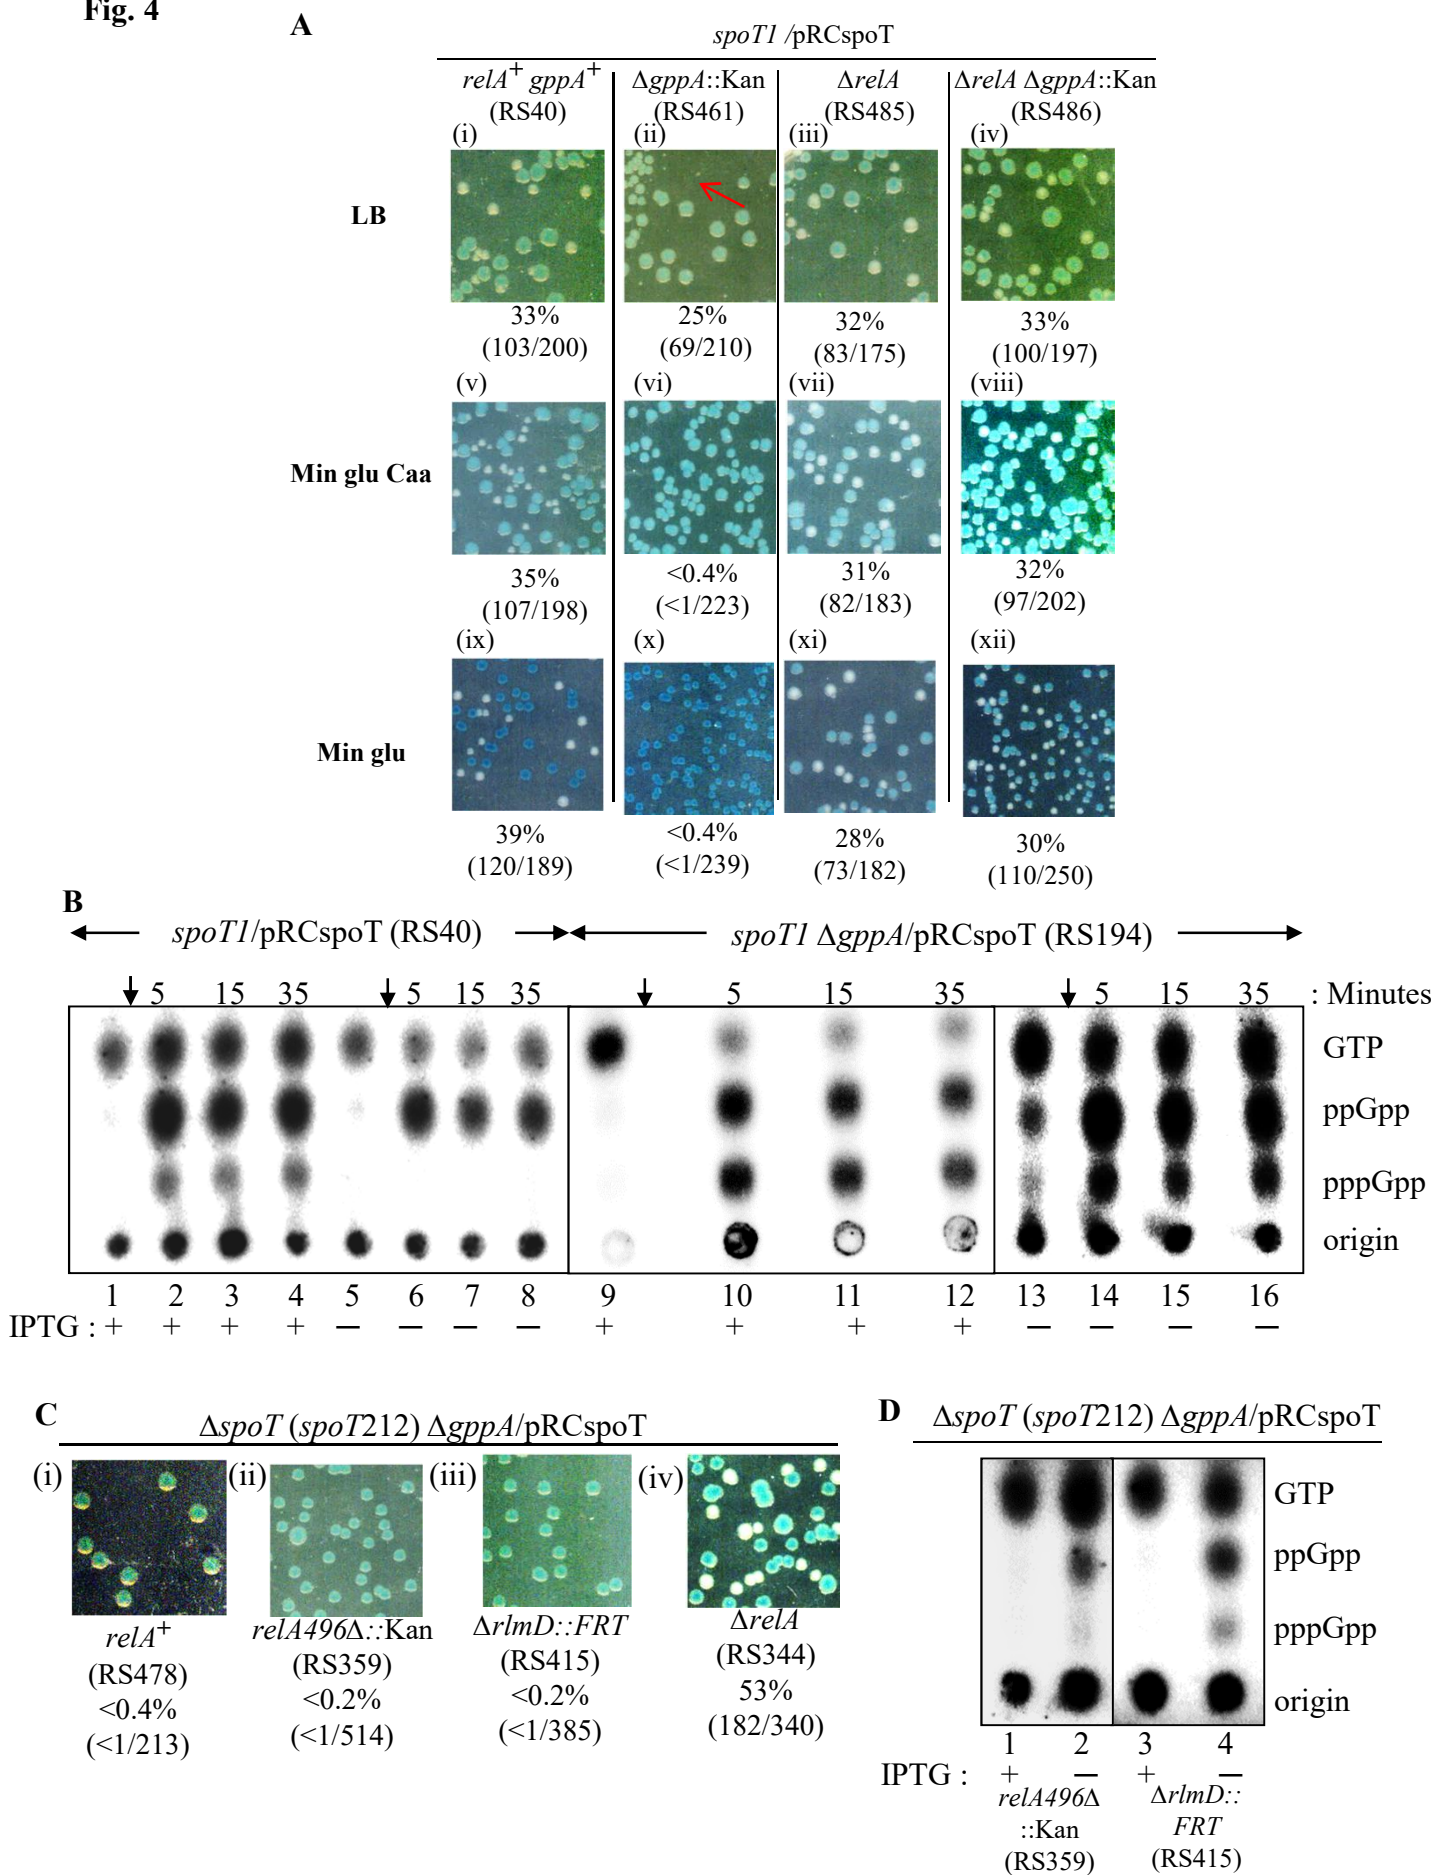

**Fig. 5**

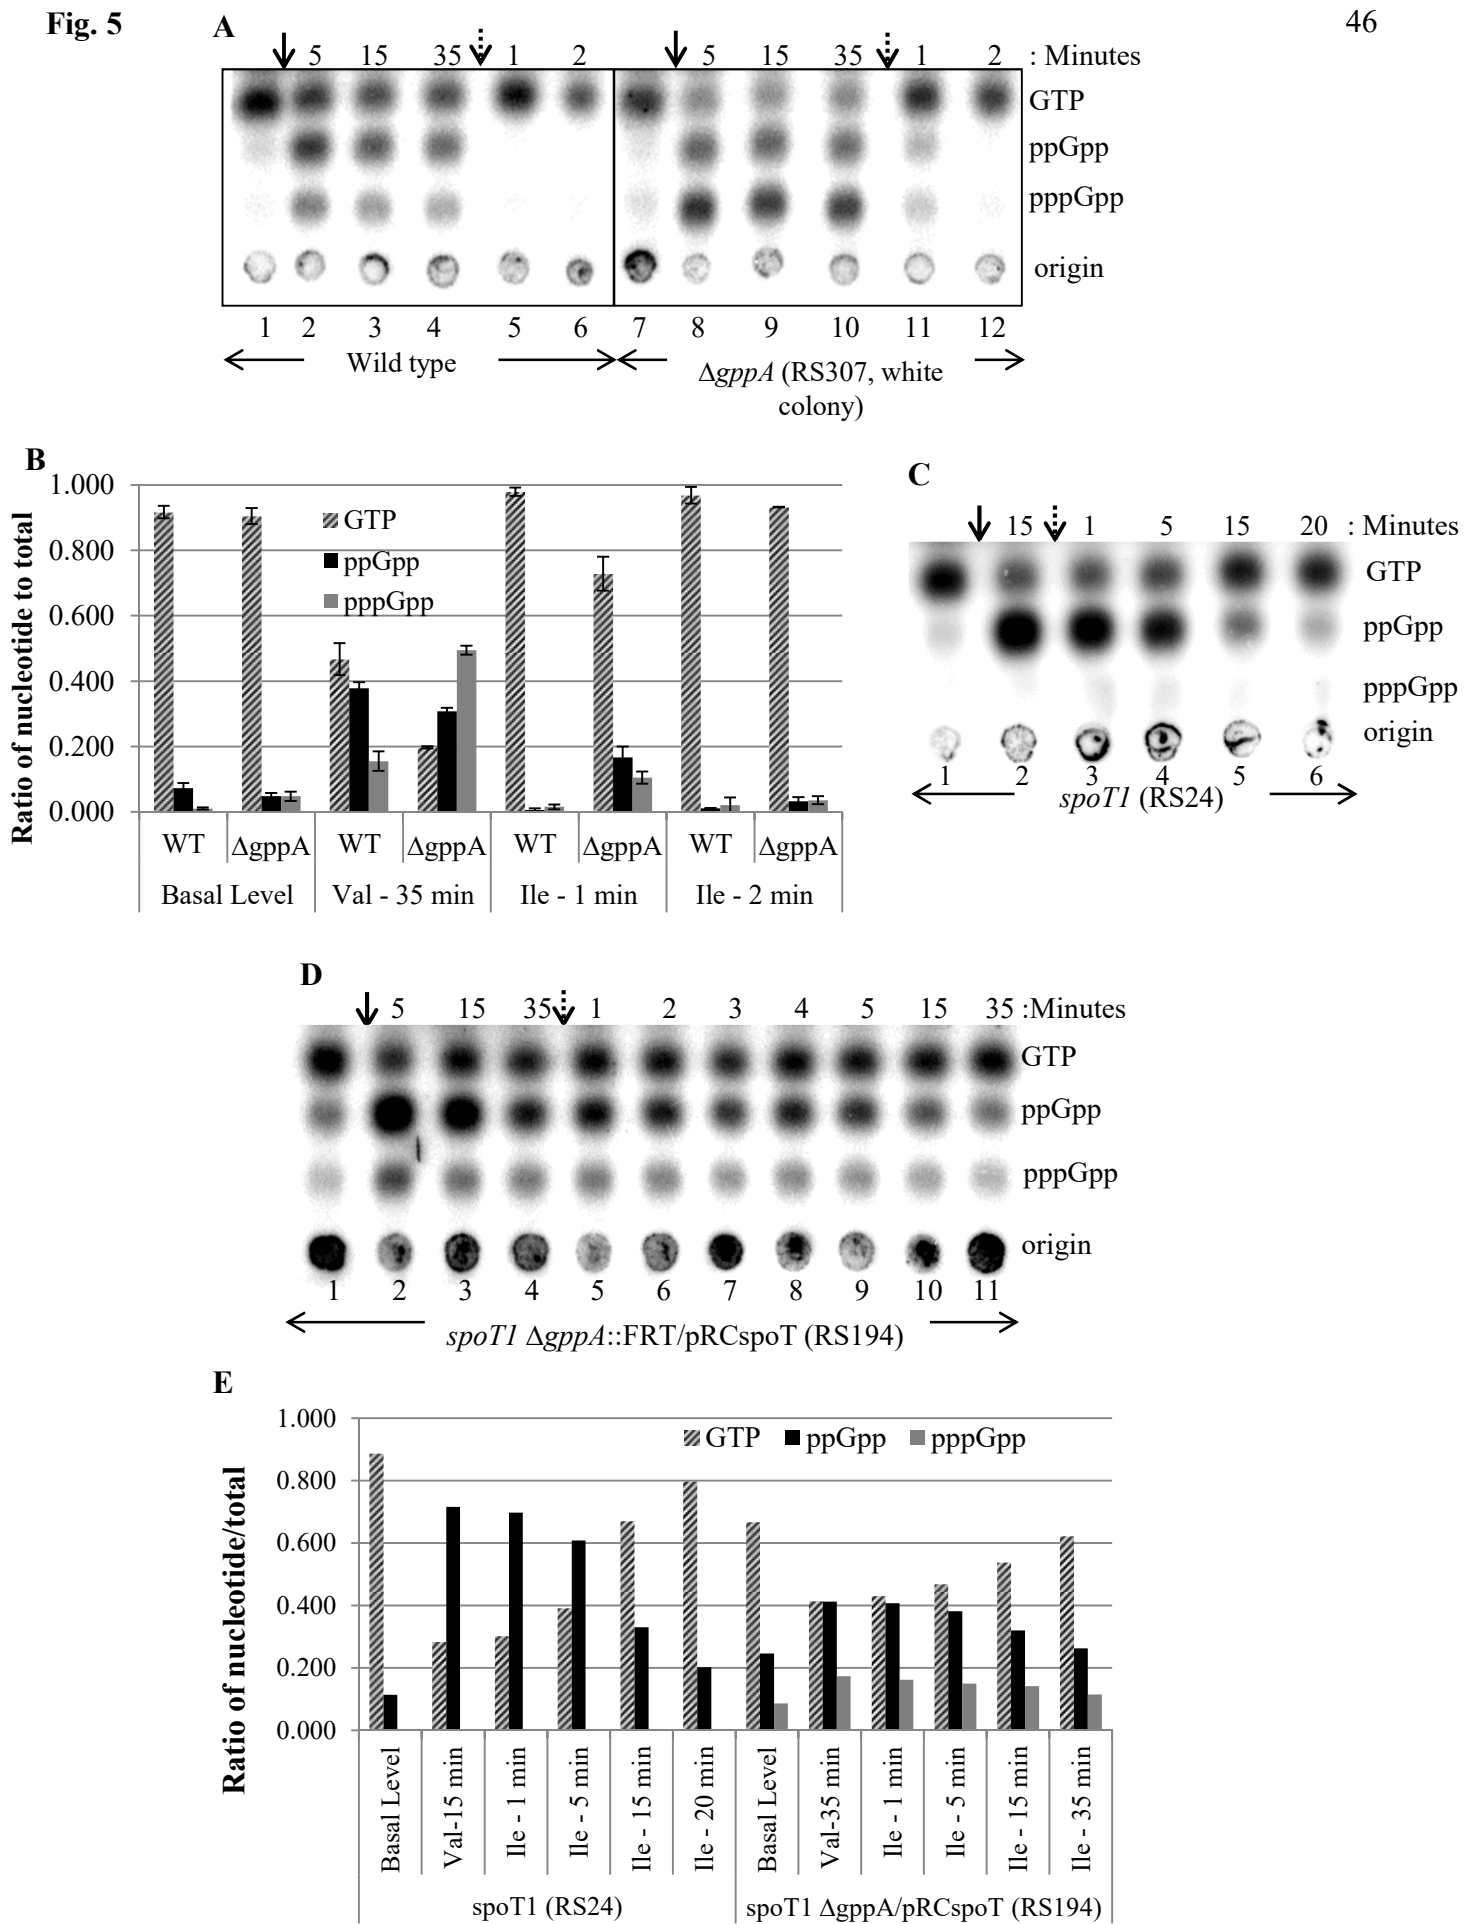

**Fig. 6**

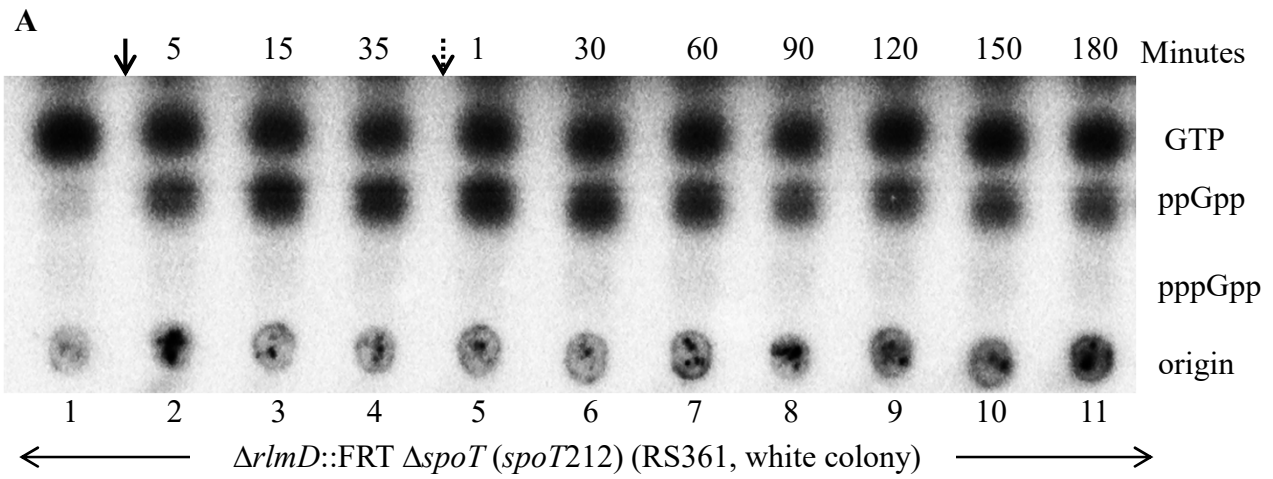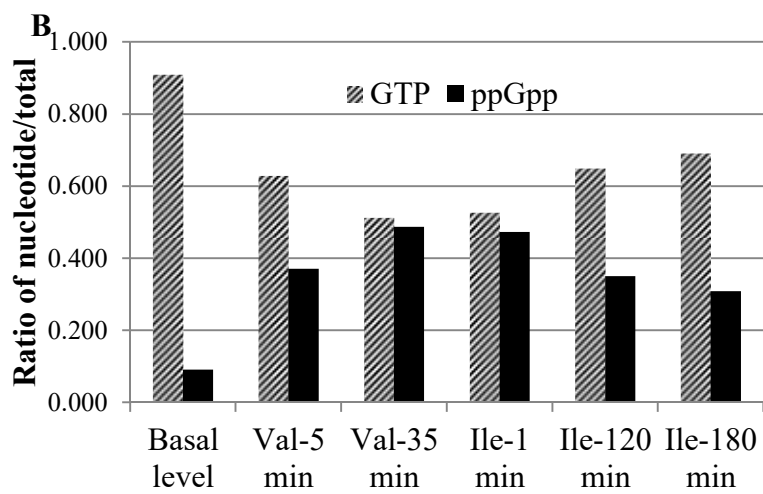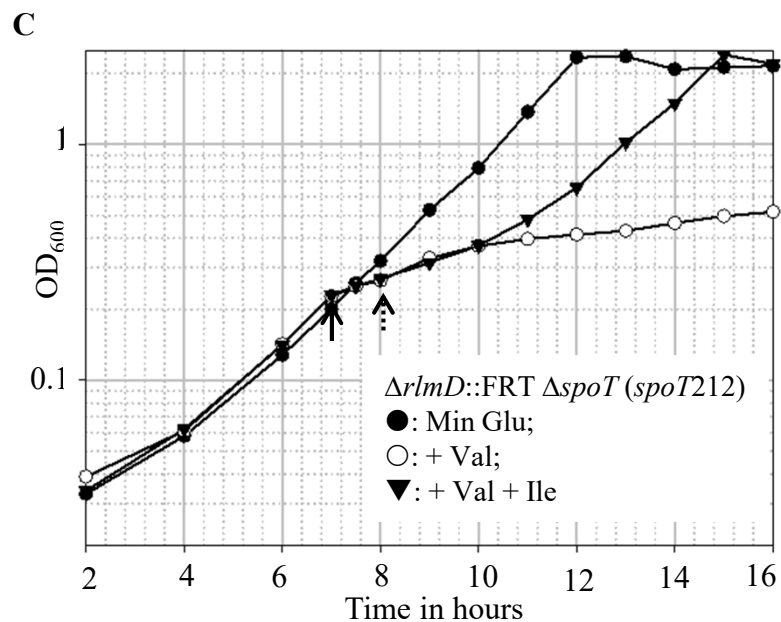

**Fig. 7**

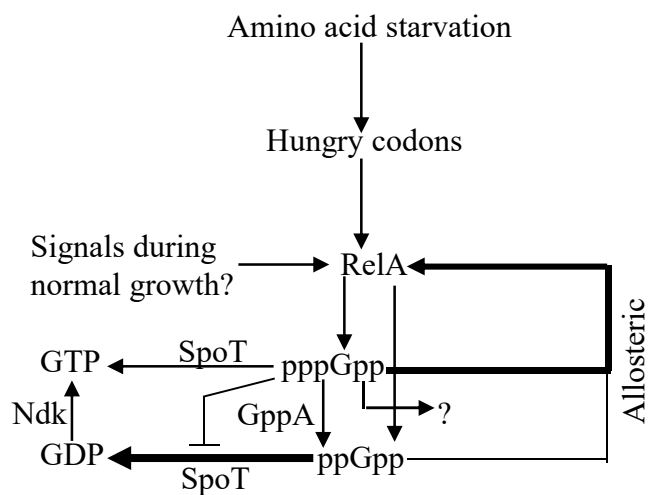

Source: http://biorxiv.org/content/10.1101/350843v1.full.pdf
